1 **Let it bud: an ultrastructural study of *Cryptococcus neoformans* surface during**  
2 **budding events**

3  
4 Glauber R. de S. Araújo<sup>1</sup>, Carolina de L. Alcantara<sup>1</sup>, Noêmia Rodrigues<sup>1</sup> Wanderley de  
5 Souza<sup>1,3</sup>, Bruno Pontes<sup>2,3†</sup> & Susana Frases<sup>1†</sup>

6  
7 <sup>1</sup> Laboratório de Ultraestrutura Celular Hertha Meyer, Instituto de Biofísica Carlos  
8 Chagas Filho, Universidade Federal do Rio de Janeiro, Rio de Janeiro, RJ, Brazil.

9 <sup>2</sup> Laboratório de Pinças Óticas (LPO-COPEA), Instituto de Ciências Biomédicas,  
10 Universidade Federal do Rio de Janeiro, Rio de Janeiro, RJ, Brazil.

11 <sup>3</sup> Centro Nacional de Biologia Estrutural e Bioimagem (CENABIO), Universidade  
12 Federal do Rio de Janeiro, Rio de Janeiro, RJ, Brazil.

13  
14 † These authors share the senior position

15  
16 Susana Frases ☎ +55 (21) 3938-6593 ✉ [susanafrases@biof.ufrj.br](mailto:susanafrases@biof.ufrj.br)

17 Bruno Pontes ☎ +55 (21) 3938-6465 ✉ [bpontes@icb.ufrj.br](mailto:bpontes@icb.ufrj.br)

18  
19 **Keywords:** *Cryptococcus neoformans*; Polysaccharide capsule; Cell wall; Budding;  
20 Electron microscopy.

21 **Abstract**

22

23 *Cryptococcus neoformans* is a fungal pathogen that causes life-threatening infections in  
24 immunocompromised individuals. It is surrounded by three concentric structures that  
25 separate the cell from the extracellular space: the plasma membrane, the cell wall and the  
26 polysaccharide capsule. Although several studies have revealed the chemical composition  
27 of these structures, little is known about their ultrastructural organization and remodeling  
28 during *C. neoformans* budding event. Here, by combining the state-of-the-art in light and  
29 electron microscopy techniques we describe the morphological remodeling that occurs  
30 synergistically among the capsule, cell wall and plasma membrane during budding in *C.*  
31 *neoformans*. Our results show that the cell wall deforms to generate a specialized budding  
32 region at one of the cell's poles. This region subsequently begins to break into layers that  
33 are slightly separated from each other and with thick tips. We also observe a reduction in  
34 density of the capsular polysaccharide around these specialized regions. Daughter cells  
35 present a distinct spatial organization, with polysaccharide fibers aligned in the direction  
36 of budding. In addition, to control the continuous openings between mother and daughter  
37 cells, the latter developed a strategy to shield themselves by forming multilamellar  
38 membrane structures in conjunction with their capsules. Together, our findings provide  
39 compelling ultrastructural evidence for a dynamic *C. neoformans* surface remodeling  
40 during budding and may have important implications for future studies exploring these  
41 remodeled specialized regions as drug-targets against cryptococcosis.

## 42 **1. Introduction**

43 Fungal infections that cause systemic mycoses have become a major threat, a  
44 clinical and a pharmaceutical challenge since the end of the 20<sup>th</sup> century, especially  
45 affecting individuals with an immunological impairment (Perfect, 2013). There are  
46 evidences showing that the increase in fungal infections might be correlated with  
47 glucocorticoid therapy, immunotherapy, oncological and hematological diseases,  
48 increased number of transplants, surgical procedures, individuals living with acquired  
49 immunodeficiency syndrome (AIDS), among others (Henaó-Martínez and Beckham,  
50 2015; Liao et al., 2016; Singh et al., 2008).

51 *Cryptococcus* spp., of which *Cryptococcus neoformans* is the main representative  
52 of the genus, is a basidiomycete that presents itself as a haploid and spherical yeast  
53 surrounded by a polysaccharide (PS) capsule, a unique feature among eukaryotes (D.  
54 McFadden et al., 2006). These cells commonly have an average diameter ranging from 2  
55 to 8  $\mu\text{m}$ ; however, under certain conditions of physical and/or chemical stresses, they can  
56 reach up to 100  $\mu\text{m}$  in diameter, the so-called “titan cells” (Faganello et al., 2006;  
57 Trevijano-Contador et al., 2018; Zaragoza, 2019; Zaragoza et al., 2003). *Cryptococcus*  
58 spp. has a global distribution and causes about 625,000 deaths per year worldwide (Park  
59 et al., 2009). The host becomes infected after inhaling spores or desiccated yeasts (Ellis  
60 and Pfeiffer, 1990) and the infection can either take its latent form, without causing any  
61 clinical symptoms, or manifest itself in the acute form of the disease (Goldman et al.,  
62 2010). Given that *Cryptococcus* spp. has a special tropism toward the Central Nervous  
63 System (CNS) and can colonize the CNS through many concomitant infection routes  
64 (Mitchell et al., 1995), one can consider cryptococcal meningitis as the most severe  
65 cryptococcosis scenario (Casadevall and Perfect, 2008).

66 The success of the infection is based on the ability of the fungus to evade the  
67 host’s immune system. During its evolution, *Cryptococcus* spp. developed several  
68 adaptation mechanisms, known as virulence factors. Some examples are: **(I)** melanin  
69 production and cell wall remodeling (resistance to cell-mediated death and  
70 immunomodulation) (Doering et al., 1999; Gómez and Nosanchuk, 2003; Huffnagle et  
71 al., 1995; Liu et al., 1999; Wang et al., 1995), **(II)** production of superoxide dismutase  
72 (protection against toxic free radicals) (Cox et al., 2003) **(III)** phospholipase and urease  
73 secretion (intracellular growth, diffusion and proliferation) (Cox et al., 2001, 2000) **(IV)**  
74 phenotypic switching (immune evasion) (Fries et al., 2001; Goldman et al., 1998), **(V)**  
75 cellular gigantism (immune evasion) (Okagaki et al., 2010; Trevijano-Contador et al.,

76 2018; Zaragoza, 2019; Zaragoza and Nielsen, 2013) and **(VI)** PS production, which is the  
77 main virulence factor used by *C. neoformans* (Araujo et al., 2012; Zaragoza, 2019;  
78 Zaragoza et al., 2009). Most of these features are believed to have been acquired through  
79 selective pressures and are likely to be the result of interactions with environmental  
80 predators, such as amoebae and nematodes (Albuquerque et al., 2019; Casadevall and  
81 Pirofski, 2007).

82 After production, *Cryptococcus* spp. PS can be either secreted to the extracellular  
83 milieu through vesicles (Rodrigues et al., 2007) or transported to the cell wall where it  
84 forms the physical structure of the capsule *in situ*. Depending on its fate, PS acquires  
85 different physicochemical and rheological properties (Araújo et al., 2019; Pontes and  
86 Frases, 2015; Zaragoza, 2019). Due to its unique morphology and the fact that it is pivotal  
87 for the establishment of pathogenesis, the PS capsule is the most distinctive feature of the  
88 *Cryptococcus* genus. It is highly dynamic, extremely hydrophilic and can be modified in  
89 response to the environment. This structure appears at the surface of the cell wall and its  
90 main roles are to protect the cell against host's defense factors and to interfere with  
91 immune response mechanisms (Perfect and Casadevall, 2011). In order to anchor to the  
92 cell wall, the PS molecules from the capsule interact with  $\alpha$ -1,3 glucans (Reese and  
93 Doering, 2003). However, the full mechanism that dictates the interaction between  
94 capsule and cell wall is far from being completely understood but is thought to involve  
95 molecular interactions between the components of both structures.

96 The fungal cell wall is an intricate network of macromolecules such as lipids,  
97 proteins and other polymers like glucans, mannans, galactomannans and chitin. This  
98 structure is considered to be a primary determinant of the fungi resistance to stress and  
99 environmental aggressions. It provides not only strength and rigidity to maintain the cell  
100 conformation but also flexibility to support morphological changes, such as cell growth  
101 and budding (Adams, 2004; Roncero, 2002; Ruiz-Herrera et al., 2002). The cryptococcal  
102 cell wall also serves as the scaffold for the assembly/anchoring of the PS capsule. Genetic  
103 interruptions of its synthesis reduce cell viability and decrease capsule assembly, often  
104 producing avirulent mutants. These features make the capsule an attractive target for the  
105 development of antifungal therapies, especially because mammalian cells do not have  
106 equivalent structures (Wang et al., 2018).

107 The cell wall is comprised by a matrix containing glycoproteins and glucose (Glc),  
108 *N*-acetylglycosamine (GlcNAc) and glucosamine (GlcN) polymers, whose main  
109 constituents are glucans, chitin and chitosans (Perfect and Casadevall, 2011). The glucans

110 are divided into  $\alpha$ - and  $\beta$ -glucans. A large fraction of  $\alpha$ - glucans present  $\alpha$ -1,3 links (Bose  
111 et al., 2003; James et al., 1990; Wang et al., 2018) whereas the majority of  $\beta$ -glucans are  
112 comprised by  $\beta$ -1,3 and  $\beta$ -1,6 bonds (James et al., 1990; Manners et al., 1973; Wang et  
113 al., 2018). Chitin, another constituent of the cell wall, is a water-insoluble  $\beta$ -1,4-GlcNAc  
114 polymer, that associates with one another to form chitooligomers (chitooligosaccharides).  
115 These chitooligomers contain between three to twenty residues of  $\beta$ -1,4-GlcNAc, which  
116 provides the cell wall with rigidity and structural integrity under various environmental  
117 conditions. In *C. neoformans*, chitooligomers are also incorporated into the capsular  
118 network and interact with glucuronoxylomannan (GXM) to form complex glycans.  
119 Chitin-derived oligomers have also been shown to regulate capsular architecture in *C.*  
120 *neoformans* cells, playing an indirect role in cryptococcal pathogenesis. Finally, they  
121 were also detected at the capsular surface, suggesting their potential to be recognized by  
122 host receptors, possibly affecting cryptococcal pathogenesis (Fonseca et al., 2013). Cell  
123 wall chitins can also be deacetylated to generate chitosan, a more soluble and flexible  
124 glucosamine polymer. *C. neoformans* have high levels of chitosan that can exceed chitin  
125 amounts up to 10 times (Banks et al., 2005). Cells without chitosan grow slower than the  
126 wild type and present impaired cell integrity and reduced virulence in animal models  
127 (Baker et al., 2011). Overall, glycoproteins are crucial components of the cell wall in  
128 fungi, as they act in critical processes, including signal transduction, conjugation, cell  
129 wall synthesis and iron acquisition. These proteins are modified by *N*-oligosaccharide and  
130 *O*-oligosaccharide bonds, usually mannosylated structures, which syntheses are initiated  
131 in the endoplasmic reticulum and in the Golgi complex (Wang et al., 2018). Glycans  
132 linked to the cryptococcal proteins contain xylose (Xyl) and Xyl-phosphate moieties (Lee  
133 et al., 2015; Park et al., 2012; Reilly et al., 2011). Even though the full spectrum of  
134 glycans has not yet been completely elucidated, it is known that it contains sialic acid that  
135 plays an anti-phagocytic role and may represent a virulence factor in the initial stages of  
136 infection (Rodrigues et al., 2002).

137         Since the last century there has been a great interest in deciphering the chemical  
138 composition of *C. neoformans* cell surface; however, little is known about its  
139 ultrastructural organization and remodeling during important events of *C. neoformans*  
140 biology. In the present work, we combined the most up-to-date light and electron  
141 microscopy techniques to describe the morphological remodeling that synergistically  
142 occurs between the capsule, the cell wall and the plasma membrane during the budding  
143 phenomenon in *C. neoformans*.

144

## 145 **2. Materials and Methods**

146

### 147 **2.1 Microorganisms**

148 The strain used in this work was *C. neoformans* var. *grubii* H99 (clinical isolate,  
149 kindly provided by Professor Arturo Casadevall - Johns Hopkins Bloomberg School of  
150 Public Health, Baltimore, Maryland, USA), a wild type strain available in the American  
151 Type Culture Collection (ATCC catalog number 208821).

152

### 153 **2.2 Capsule induction and culture conditions**

154 Yeasts were grown in Sabouraud Dextrose Broth (Kasvi, PR, Brazil) medium at  
155 37°C with constant agitation at various times, depending on the experimental conditions.  
156 For video microscopy observations, the yeasts were taken directly from Sabouraud  
157 Dextrose Agar (Kasvi, PR, Brazil) and, subsequently, added in liquid culture medium and  
158 processed, as described below. In order to induce capsule formation, the yeasts were kept  
159 at 37°C for 7 days in a nutrient-deprived medium called Minimal Medium (MM)  
160 containing only 15 mM glucose, 10 mM MgSO<sub>4</sub>·7H<sub>2</sub>O, 29 mM KH<sub>2</sub>PO<sub>4</sub>, 13 mM glycine  
161 and 3 μM thiamine (all compounds from Merck Millipore, Darmstadt, Germany).

162

### 163 **2.3 Video microscopy**

164 An initial inoculum of 10<sup>4</sup> cells/mL in Sabouraud medium was added to 35 mm  
165 glass bottom dishes (Thermo Scientific™ Nunc Glass Bottom Dish, Waltham, MA,  
166 USA) and observed under a Nikon Eclipse TE300 inverted microscope equipped with a  
167 CFI Achromatic LWD ADL 40X objective lens. For 5 hours, phase contrast images were  
168 captured every minute using a Hamamatsu C2400 CCD camera (Hamamatsu, Japan).  
169 Images were then mounted into stacks and analyzed using the ImageJ 1.8.0 software  
170 (NIH, Bethesda, MD, USA - <https://imagej.nih.gov/ij/>) (Abramoff et al., 2004; Schneider  
171 et al., 2012).

172

### 173 **2.4 Conventional fluorescence microscopy and structured illumination microscopy** 174 **(SIM)**

175 Yeast cells (10<sup>6</sup>) were centrifuged at 6,708 g for 5 minutes, resuspended in 4%  
176 (v/v) paraformaldehyde (Electron Microscopy Sciences, Hatfield, PA, USA) in phosphate  
177 buffered saline (PBS) (137 mM NaCl, 2.7 mM KCl, 10 mM Na<sub>2</sub>HPO<sub>4</sub> and 1.8 mM

178  $\text{KH}_2\text{PO}_4$ ) pH 7.2 and incubated for 30 minutes at room temperature. Next, fixed cells  
179 were washed twice with PBS and incubated with 1% bovine serum albumin (Sigma  
180 Aldrich, Darmstadt, Germany) in PBS for 1 hour at room temperature. The cells were  
181 then incubated for another hour at room temperature with 18B7 mAb (10  $\mu\text{g}/\text{mL}$ ). The  
182 18B7 mAb is a mouse IgG1 with high affinity for GXM from different cryptococcal  
183 serotypes (Goldman et al., 1998). After three washes in PBS, cells were incubated with  
184 10  $\mu\text{L}/\text{mL}$  of the anti-mouse Alexa Fluor® 594 secondary antibody (Thermo Fisher  
185 Scientific, Waltham, Massachusetts, USA) for 1 hour at room temperature. Again, cells  
186 were washed with PBS buffer and incubated with Uvitex2B (Polyscience Inc,  
187 Warrington, PA, USA) for 1 hour at room temperature and subsequently, vigorously  
188 washed 4 times with PBS buffer in order to remove all Uvitex2B dye to minimize  
189 background.

190 Cell suspensions were mounted on glass coverslips and observed using an Axio  
191 Observe or an Elyra PS.1 microscope (Zeiss, Germany). Images were acquired with their  
192 respective software packages and subsequently processed using ImageJ 1.8.0 software  
193 (NIH, Bethesda, MD, USA - <https://imagej.nih.gov/ij/>) (Abràmoff et al., 2004; Schneider  
194 et al., 2012) .

195

## 196 **2.5 Conventional scanning electron microscopy (CSEM)**

197 The cells of interest were washed three times in PBS pH 7.2 and fixed in 2.5%  
198 glutaraldehyde solution grade I (Electron Microscopy Sciences, Hatfield, PA, USA) in  
199 sodium cacodylate buffer 0.1 M pH 7.2 for 1 hour at room temperature. Then, the cells  
200 were washed three times in 0.1 M sodium cacodylate buffer pH 7.2 containing 0.2 M  
201 sucrose and 2 mM  $\text{MgCl}_2$  (Merck Millipore Darmstadt, Germany), and adhered to 12 mm  
202 diameter round glass coverslips (Paul Marienfeld GmbH & Co. KG, Germany) previously  
203 coated with 0.01% poly-L-lysine (Sigma-Aldrich, Darmstadt, Germany) for 20 minutes.  
204 Adhered cells were then gradually dehydrated in an ethanol (Merck Millipore, Darmstadt,  
205 Germany) series (30, 50 and 70% for 5 minutes and 95% and 100% twice for 10 minutes).  
206 The dehydration procedure was meticulously monitored to prevent PS collapse during air  
207 drying or PS extraction due to excessive incubation. The coverslips were then critical-  
208 point-dried using an EM DPC 300 critical point drier (Leica, Germany) and mounted on  
209 specimen stubs using a conductive carbon adhesive (Pelco Tabs™, Stansted, Essex, UK).  
210 Next, the samples were coated with a thin layer of gold or gold-palladium (10-15 nm)  
211 using the sputter method (Balzers Union FL -9496, Balzers, FL). Finally, samples were



212 visualized in a scanning electron microscope (Zeiss Evo 10 or FEI Quanta 250) operating  
213 at 10-20 kV with an average working distance of 10 mm and images were collected with  
214 their respective software packages.

215

## 216 **2.6 High resolution scanning electron microscopy (HRSEM)**

217 The cells were processed following the same methodology described above  
218 (please, see CSEM). However, in order to proceed with HRSEM, the samples were  
219 sputtered with a 3 nm thick platinum layer on their surfaces and observed in high  
220 resolution electron microscopes, either FEI Magellan™ (FEI Company, Oregon, USA)  
221 or Zeiss Auriga-40 (Zeiss, Germany) operating at 1 kV with an average working distance  
222 of 2 mm and images were collected using their respective software packages.

223 Quantification of PS fiber anisotropy was performed using FibrilTool (Boudaoud  
224 et al., 2014), an ImageJ plug-in that determines the average orientation of a fiber array.  
225 The anisotropy value ranges from a maximum of 1, when all fibers point to the same  
226 direction, to a minimum of 0, when fibers are randomly oriented.

227

## 228 **2.7 Transmission electron microscopy (TEM)**

229 The cells were washed three times in PBS pH 7.2 and subsequently fixed in 2.5%  
230 (v/v) glutaraldehyde solution grade I in 0.1 M sodium cacodylate buffer pH 7.2 and  
231 microwaved (350 W, 3 pulses of 30 seconds each with an interval of 60 seconds between  
232 pulses) (Benchimol et al., 1993; Giberson et al., 2003). Subsequently, the cells were  
233 washed three times in 0.1 M sodium cacodylate buffer pH 7.2. The cells were then post-  
234 fixed using an Osmium-Thiocarbohydrazide-Osmium (OTO) protocol. Briefly, cells  
235 were incubated in a post-fixative 1% (v/v) osmium tetroxide (OsO<sub>4</sub>), 0.8% (v/v)  
236 potassium ferrocyanide and 5 mM calcium chloride, in 0.1 M cacodylate buffer (pH 7.2)  
237 for 10 min, washed twice in water, and then incubated in 1% (w/v) thiocarbohydrazide  
238 (TCH, Sigma, Darmstadt, Germany) in water, for 5 min (Murakami et al., 1983; Seligman  
239 et al., 1966; Willingham and Rutherford, 1984). After three washes in water, cells were  
240 again incubated in the post-fixative osmium solution for 2 min and finally washed three  
241 times in water. Next, cells were gradually dehydrated in an acetone (Merck Millipore,  
242 Darmstadt, Germany) series: 50%, 70%, 90% and two subsequent 100%. All the  
243 dehydration procedures were performed in the microwave (350 W, 10 seconds pulses for  
244 each step). The Spurr resin (Electron Microscopy Sciences, Hatfield, PA) was gradually  
245 used to substitute acetone in the following proportions acetone: Spurr (v:v): 3:1, 2:1, 1:1,



246 1:2, 1:3 and finally pure Spurr. Each mixture was also submitted to the same microwave  
247 cycles for 2 minutes except the last step (pure Spurr) that was performed without any  
248 radiation. The polymerization step was carried out for 48 hours in an oven at 70°C. The  
249 samples were sliced in 75 nm sections under a Leica EM UC7 ultramicrotome (Leica,  
250 Wetzlar, Germany), collected onto formvar-coated copper slot grids and submitted to an  
251 incubation with 5% (w/v) uranyl acetate in water for 20 minutes and lead citrate for 5  
252 minutes for contrasting. Finally, the samples were observed in a Tecnai™ Spirit  
253 microscope operated at 120 kV (FEI Company, Oregon, USA) and images were collected  
254 using the microscope software.

255

## 256 **2.8 Electron tomography and three-dimensional reconstruction**

257 The samples were processed following the same procedures described above (see  
258 TEM). However, for electron tomography, a few different steps were performed, as  
259 follows. Samples were sliced into 200 nm thick serial sections under a Leica EM UC7  
260 ultramicrotome (Leica, Wetzlar, Germany), collected onto formvar-coated copper slot  
261 grids and stained with 5% (w/v) uranyl acetate for 3 minutes and Reynolds' Lead citrate  
262 for 5 minutes. The tomographic series were acquired with an inclination of  $\pm 65^\circ$  and  $1^\circ$   
263 increments under a Tecnai Spirit™ (FEI Company, Oregon, USA) transmission electron  
264 microscope operating at 120 kV with a 2,048 X 2,048 pixels' matrix CCD camera. Serial  
265 tilt series were aligned using Etomo, an open-source software from IMOD package, a set  
266 of image processing, modeling and display programs used for tomographic reconstruction  
267 and for 3D reconstruction of EM serial sections (Kremer et al., 1996; Mastronarde, 1997).  
268 Generated tomograms were reconstructed using 3dmod.

269

## 270 **2.9 Statistical analysis**

271 Statistical analysis were performed using GraphPad Prism 8.4.0 (GraphPad  
272 Software, La Jolla, CA). Student's *t*-test was used for comparisons.

273

## 274 **3. Results**

275

### 276 **3.1 *Cryptococcus neoformans* differentiates a region of its cell wall to generate** 277 **daughter cells.**

278

279 *C. neoformans* divides through budding of daughter cells from mother cells (Lin  
280 et al., 2014). To revisit and better characterize this phenomenon, yeast cell cultures were  
281 grown in Sabouraud Dextrose Broth medium and were allowed to attach onto coverslips.  
282 Next, we acquired phase contrast images of the same field of view every minute for 5  
283 hours. Images were mounted in stacks allowing us to follow the proliferative behavior of  
284 the cells. Mother cells (G1) generated their daughters (G1.1) at an average rate of one cell  
285 every ( $1.3 \pm 0.3$ ) h (Figure 1 and Supplementary Video 1). Moreover, successive daughter  
286 cells always bud from the same regions of their respective mothers, not only from cells  
287 that were attached since the beginning (Figures 1A, 1B and 1C and Supplementary Video  
288 1), but also from daughter cells that subsequently attached to the coverslips after budding  
289 and also started to generate daughter cells of their own (Figures 1C and 1D and  
290 Supplementary Video 1).

291 Although this observation is already a consensus in the *Cryptococcus* field  
292 (Zaragoza et al., 2006a, 2006b) it led us to hypothesize that the mother cell might develop  
293 a specialization at the cell wall, creating a region with certain characteristics that might  
294 facilitate budding.

295

### 296 **3.2 *Cryptococcus neoformans* mother cell wall reorganizes prior to budding of** 297 **daughter cells.**

298 In order to unravel details of these specialized regions (SRs), *Cryptococcus*  
299 *neoformans* yeast cell cultures were stained with Uvitex2B to label the chitin polymers  
300 present in the cell wall and subsequently were observed in a conventional fluorescence  
301 microscope. Images showed that mother cells, before budding of daughter cells, formed  
302 regions of lower fluorescence intensities when compared to the rest of the cell perimeter  
303 (Figures 2A, 2B and 2C).

304 In an attempt to better clarify the organization of these SRs, we also imaged *C.*  
305 *neoformans* cells using SIM. Uvitex2B was used together with 18B7 + Alexa Fluor®  
306 594, to stain both the cell wall and the PS capsule respectively (Figure 3). The results  
307 confirmed the decrease in fluorescence intensities around the SR when compared to the  
308 entire cell perimeter (Figures 3A, 3B and 3C). Furthermore, although with few details, it  
309 was possible to identify that the cell walls seemed to peel off in order to form the SRs  
310 from which daughter cells bud. (Figure 3C and Supplementary Video 2).

311

### 312 **3.3 Ultrastructural details of *C. neoformans* specialized regions during budding.**

313 In order to better visualize the SRs with greater resolving power, we used  
314 transmission electron microscopy (TEM) and three-dimensional reconstruction by  
315 electron microscopy.

316 *Cryptococcus neoformans* yeast cell cultures were imaged using TEM. By using  
317 this technique, we were able to specifically follow the various steps of the budding  
318 process (Figures 4, 5 and 6). Our observations demonstrated that the process started with  
319 the shape change of one of the poles of the cell which deformed, lost sphericity and  
320 formed a more pointed region in the cell wall that, at some point, began to break into  
321 layers (Figures 4A and 4B). As the daughter cell started to appear, the formed layers  
322 became more evident with thick tips slightly separated from each other (Figures 4C and  
323 4D). When the daughter cell is released, a new budding event is likely to arise in the same  
324 region as the first detached daughter cell turns the area more prone for subsequent  
325 occurrences (Figures 4E and 4F).

326 Electron tomography and three-dimensional reconstruction were also performed  
327 in order to enable us to observe further details about the budding events (Figure 5 and  
328 Supplementary Video 3). Strikingly, with the tomography series, it became clearer that  
329 not only there is a separation of the mother cell wall into layers with thick tips (Figures  
330 5A and 5B), as previously described (Figure 4), but also that the mother cell wall is thicker  
331 than the daughter cell wall (Figure 5D). Interestingly, daughter cells presented  
332 multilamellar membranous structures that seem to cover the continuous openings  
333 between daughter and mother cells, as a protective barrier (Figure 5D and 5E). It also  
334 became evident that the entire budding process induced capsule reorganization around  
335 the SRs (Figures 4 and 5). The most striking changes observed in the capsule morphology  
336 during budding were the reduction in PS density around SRs (Figure 4) and the formation  
337 of a protective PS barrier surrounding the SRs of both mother and daughter cells (Figures  
338 5C, 5D and 4E). Three-dimensional reconstruction clearly demonstrated all of these  
339 characteristics (Figures 5F and 5G).

340 Thus, cell wall structural reorganization and capsule remodeling are evident  
341 processes that occur in both mother and daughter cells during budding.

342

343 **3.4 Capsule polysaccharide fibers around specialized regions of daughter cells are**  
344 **oriented towards the budding events.**

345 In order to clarify the details of capsule remodeling and also to better understand  
346 the PS reduced density around the SRs, *C. neoformans* were processed and visualized by  
347 conventional and high-resolution scanning electron microscopes (Figure 6).

348 As previously described (Figures 4 and 5), the images presented in Figure 6  
349 confirmed not only the remodeling but also the reduction in PS density around the SRs.  
350 Moreover, the PS fibers from daughter cells have a distinct spatial organization  
351 surrounding these SRs, with fibers aligned in the direction of budding (Figures 6A – 6E).  
352 In order to better quantify these visual observations, we performed a quantitative analysis  
353 using the FibrilTool plug-in (Boudaoud et al., 2014). The results (Figure 6F) showed that,  
354 overall, the PS fibers around SRs present a higher anisotropy when compared to fibers  
355 outside the SRs. This special arrangement around SRs may be related to the mechanical  
356 force that occurs during budding.

357

#### 358 **4. Discussion**

359 *Cryptococcus neoformans* present themselves as haploid and spherical yeasts,  
360 surrounded by a PS capsule, unique feature among eukaryotes (D. C. McFadden et al.,  
361 2006). PS capsule in *C. neoformans* is its main virulence factor (Doering, 2000;  
362 Rodrigues et al., 2009; Zaragoza, 2019; Zaragoza et al., 2009), and it plays several roles,  
363 such as protection against dehydration and phagocytosis by natural predators in the  
364 environment. In addition, in the context of human infection, the PS capsule provides  
365 protection against phagocytosis, inhibition of leukocyte migration, depletion of the  
366 complement system and inhibition of antibody production (Dong et al., 1995; Feldmesser  
367 et al., 2001; Kozel et al., 1977; Macher et al., 1978; Murphy and Cozad, 1972; Retini et  
368 al., 1998; Zaragoza et al., 2009, 2008). Thus, the PS capsule becomes a primary  
369 component of interaction between the fungi and their host cells, using its  
370 immunomodulatory dynamics and its antiphagocytic properties to hinder the host's  
371 immune response, therefore becoming one of the main targets for therapeutic strategies  
372 (Casadevall and Pirofski, 2007; Larsen et al., 2005). In addition, and just underneath the  
373 PS capsule, there is a rigid structure called the cell wall. It is considered to be the primary  
374 determinant of *C. neoformans* resistance to stress and environmental aggressions. The  
375 cell wall architecture, thoroughly described in the introduction of the present study,  
376 consists mainly of a polymer network, including chitin, glucans, manans and  
377 galactomanans as its major components (Roncero, 2002; Ruiz-Herrera et al., 2002).

378 Polarized cell growth (PCG) and directional cell division (DCD) are fundamental  
379 and essential processes for the development of eukaryotes. PCG involves asymmetric  
380 growth of a cell region to form specific cell structures or shapes. The resulting specialized  
381 structures are critical for the function of several cell types and can help mediate various  
382 cell interactions during development. Some examples are the absorption of nutrients by  
383 epithelial cell microvilli (Mooseker, 1985) and the interaction between T and B cells  
384 (Kupfer et al., 1986; Madden and Snyder, 1998). Likewise, PCG in fungi occurs by  
385 inserting new material into the plasma membrane via the secretory pathways together  
386 with concomitant cell wall remodeling. It can be either triggered by internal factors, for  
387 example progression of the cell cycle, or by external factors, such as changes in the  
388 environment or nutritional status (Bassilana et al., 2020). Although filamentous fungi and  
389 yeasts show obvious differences in their growth modes, they share three basic properties  
390 that allow for PCG and the formation of a diverse variety of cellular forms: **(I)** symmetry  
391 breaking, in which an initially isotropic cell generates a polarized growth axis, **(II)**  
392 maintenance of polarity, which refers to the stabilization of the polarity axis, so that polar  
393 growth is maintained, and finally **(III)** depolarization, in which polarity is lost in a  
394 controlled manner. The balance between polarity maintenance and depolarization  
395 generates the diversity in fungal cell forms (Lin et al., 2014). Fungal cells are not always  
396 polarized during the early stages of development. They usually undergo an initial period  
397 of non-polar isotropic expansion (for example, spores from yeast stem cells). Ultimately,  
398 however, cell symmetry must be broken, and a polarity axis generated, both for the  
399 selection of the sprouting site or for the development of polar structures, such as hyphae.

400 Many of the studies that focused on cell division events for pathogenic yeasts used  
401 paradigms established in the ascomycete *Saccharomyces cerevisiae*. However,  
402 basidiomycete yeasts, such as *C. neoformans*, show conserved and distinct features in  
403 their morphogenesis. It only produces hyphae during sexual differentiation (Lin et al.,  
404 2014) and their produced spores are quite infectious and can be the primary particle  
405 inhaled during a natural infection (Giles et al., 2009; Velagapudi et al., 2009). Once  
406 inhaled, upon reaching the lungs, the Cryptococci spores germinate to produce yeast cells.  
407 In the context of infection, this fungus grows within the human host almost exclusively  
408 in the form of yeasts. Histopathological studies have shown that hyphal forms are rarely  
409 found during human infections by *C. neoformans*. and elongated fungal morphologies are  
410 only observed as rare variants among clinical strains (Baker and Haugen, 1955; Fu et al.,  
411 2019; Shadomy and Utz, 1966).

412 Cellular events during *C. neoformans* yeast cell morphogenesis are well  
413 described, but still lack information regarding ultrastructural changes. In general, cells  
414 undergo a cell division cycle with asexual and repeated clonal budding of a haploid yeast  
415 cell; however, unlike *S. cerevisiae*, in which subsequent sprouting events occur adjacent  
416 to previous scars, *C. neoformans* preferentially and repeatedly generates their daughter  
417 cells from the same location, as shown in the present study. For this reason, scar count,  
418 as a result of budding, is unlikely to provide an accurate age measurement of cryptococcal  
419 cells (Adams, 2004; Zhao et al., 2019).

420 The fungal cell wall is a protective barrier that resists environmental and osmotic  
421 stresses, maintaining cell morphology and regulating membrane permeability, as well as  
422 a wide range of essential roles during the fungus's interaction with its environment (Free,  
423 2013; Gooday, 1995). However, in spite of serving as a protective structure, the cell wall  
424 also needs to be remodeled and even partially ruptured for the subsequent budding events  
425 that will allow the perpetuation of the fungus in its chosen infection site. Our results not  
426 only corroborate this hypothesis but also describe for the first time, to the best of our  
427 knowledge, the morphological features of how this remodeling occurs. We showed that  
428 the cell wall starts to form a fissure-like structure that culminates with the opening of a  
429 specialized region where *C. neoformans* preferentially and repeatedly generates its  
430 daughter cells. The cell wall is then reorganized into layers similar to “wafer cookies”  
431 around the specialized region. We conjecture that the formation of this region is related  
432 to a protruding force coming from inside the cell.

433 However, apart from the mechanical aspect, we cannot completely rule out the  
434 possibility of a change in biochemical composition to facilitate this process. It is known  
435 that the cell wall is divided into two layers with specific components. The inner layer is  
436 mainly composed of  $\beta$ -glucan and chitin arranged as fibers parallel to the plasma  
437 membrane and the outer layer contains  $\alpha$ -glucan and  $\beta$ -glucan (O’Meara and Alspaugh,  
438 2012; Sakaguchi et al., 1993). Moreover, several cell wall proteins have been described  
439 to have key roles in the capsule architecture. Some of these proteins, such as the GPI-  
440 linked  $\beta$ -glucanase Gas1, have been implicated in remodeling of the cell wall as it directly  
441 acts on  $\beta$ -1,3-glucans (Eigenheer et al., 2007; Levitz and Specht, 2006). Therefore,  
442 preceding cell budding, perhaps still during the PCG stage, the structural components of  
443 the cell wall may be reorganized in order to form a region where budding is facilitated.  
444 In the present study, we have described the morphological aspects of the cell wall



445 remodeling. The molecular and mechanical details constitute lines of investigation for  
446 future studies.

447         Beyond the cell wall and attached to its surface lies the PS capsule. Despite its  
448 homogeneous appearance, when viewed through light microscopy, several lines of  
449 evidence show that the capsule is a highly heterogeneous structure with a complex and  
450 dynamic spatial organization. It is known, for example, that the capsule matrix exhibits  
451 clear vertical stratification, with distinct density regions, with its inner part having a  
452 higher fiber density than its outer region (Araújo et al., 2016, 2017; Bryan et al., 2005; S.  
453 Frases et al., 2009; Gates et al., 2004). Although softer than the cell wall and presenting  
454 viscoelastic behavior (Araújo et al., 2019; Susana Frases et al., 2009), the high PS density  
455 of the inner region prevents the penetration of larger macromolecules, including  
456 antibodies and proteins of the complement system, restricting the access of these  
457 molecules to the cell wall (Gates et al., 2004; Gates and Kozel, 2006). Therefore, one  
458 could speculate that the capsule might also undergo remodeling during budding. Indeed,  
459 our results show that the PSs constituting the capsule undergo shape changes around the  
460 specialized budding region. The change in shape seems to be correlated with the  
461 conjectured protruding force, as the capsule fibers tend to orient towards the budding  
462 event. Finally, our results also demonstrate that the PS capsule works as a protective  
463 shield around the specialized region during the budding event.

464         In conclusion, we have combined the state-of-the-art in light and electron  
465 microscopy techniques to describe the structural changes that synergistically occur  
466 between the capsule, cell wall and plasma membrane during the budding phenomenon in  
467 *C. neoformans*. We have presented evidences supporting a possible remodeling through  
468 mechanical protruding forces originated inside the yeast cell, although the magnitude of  
469 such force and the mechanism behind its generation have yet to be elucidated. All  
470 morphological changes observed, particularly those from the cell wall, act together and  
471 create a specialized region with characteristics that seem to favor budding events, which  
472 is able to partially explain why budding in *C. neoformans* always occur in the same  
473 region. However, the complete mechanism may also involve controlled rearrangement of  
474 the molecules that constitute both the cell wall and the PS capsule and will be explored  
475 in future studies. We also aim to explore and characterize further these specialized regions  
476 such that they could be used as potential drug-targets against cryptococcosis.

477

478 **5. Author Contributions**



479 **Glauber R. de S. Araújo:** Conceptualization, Methodology, Investigation,  
480 Visualization, Data curation, Formal analysis, Writing - original draft, Writing - review  
481 & editing.

482 **Carolina de L. Alcantara:** Methodology, Writing - review & editing

483 **Noêmia Rodrigues:** Methodology, Writing - review & editing

484 **Wanderley de Souza:** Supervision, Funding acquisition, Formal analysis, Writing -  
485 review & editing

486 **Bruno Pontes:** Conceptualization, Methodology, Investigation, Visualization, Data  
487 curation, Resources, Supervision, Funding acquisition, Formal analysis, Writing -  
488 original draft, Writing - review & editing.

489 **Susana Frases:** Conceptualization, Methodology, Investigation, Visualization, Data  
490 curation, Resources, Supervision, Funding acquisition, Formal analysis, Writing -  
491 original draft, Writing - review & editing.

492

## 493 **6. Conflict of interest**

494 The authors declare that they have no known competing financial interests or personal  
495 relationships that could have appeared to influence the work reported in this paper.

496

## 497 **7. Acknowledgments**

498 We acknowledge Dr. Barbara Hissa for critical reading and scientific editing of the  
499 manuscript. We also thank the technicians from Centro Nacional de Biologia Estrutural  
500 e Bioimagem (CENABIO/UFRJ) for all-important help. This work was supported by the  
501 Brazilian agencies Conselho Nacional de Desenvolvimento Científico e Tecnológico  
502 (CNPq), Coordenação de Aperfeiçoamento de Pessoal de Nível Superior (CAPES) -  
503 Finance Code 001 and Fundação Carlos Chagas Filho de Amparo à Pesquisa do Estado  
504 do Rio de Janeiro (FAPERJ).

505

## 506 **8. Appendix A. Supplementary data**

507 Supplementary video 1, Supplementary video 2 and Supplementary video 3.

508

## 509 **8. References**

510 Abramoff, M.D., Magalhaes, P., Ram, S.J., 2004. Image processing with ImageJ.  
511 *Biophotonics Int.* 11, 36–42.

512 Adams, D.J., 2004. Fungal cell wall chitinases and glucanases. *Microbiology* 150, 2029–

- 513 2035. <https://doi.org/10.1099/mic.0.26980-0>
- 514 Albuquerque, P., Nicola, A.M., Magnabosco, D.A.G., Derengowski, L. da S.,  
515 Crisóstomo, L.S., Xavier, L.C.G., Frazão, S. de O., Guilhelmelli, F., de Oliveira,  
516 M.A., Dias, J. do N., Hurtado, F.A., Teixeira, M. de M., Guimarães, A.J., Paes, H.C.,  
517 Bagagli, E., Felipe, M.S.S., Casadevall, A., Silva-Pereira, I., 2019. A hidden battle  
518 in the dirt: Soil amoebae interactions with *Paracoccidioides* spp. *PLoS Negl. Trop.*  
519 *Dis.* 13, e0007742. <https://doi.org/10.1371/journal.pntd.0007742>
- 520 Araújo, G.R. de S., Freitas, G.J.C., Fonseca, F.L., Leite, P.E.C., Rocha, G.M., de Souza,  
521 W., Santos, D.A., Frases, S., 2017. The environmental yeast *Cryptococcus*  
522 *liquefaciens* produces capsular and secreted polysaccharides with similar pathogenic  
523 properties to those of *C. neoformans*. *Sci. Rep.* 7, 46768.  
524 <https://doi.org/10.1038/srep46768>
- 525 Araújo, G.R., Fontes, G.N., Leão, D., Rocha, G.M., Pontes, B., Sant'Anna, C., de Souza,  
526 W., Frases, S., 2016. *Cryptococcus neoformans* capsular polysaccharides form  
527 branched and complex filamentous networks viewed by high-resolution microscopy.  
528 *J. Struct. Biol.* 193, 75–82. <https://doi.org/10.1016/j.jsb.2015.11.010>
- 529 Araújo, G.R.D. de S., Viana, N.B., Pontes, B., Frases, S., 2019. Rheological properties of  
530 cryptococcal polysaccharide change with fiber size, antibody binding and  
531 temperature. *Future Microbiol.* 14, 867–884. [https://doi.org/10.2217/fmb-2018-](https://doi.org/10.2217/fmb-2018-0320)  
532 0320
- 533 Araujo, G.S., Fonseca, F.L., Pontes, B., Torres, A., Cordero, R.J.B., Zancopé-Oliveira,  
534 R.M., Casadevall, A., Viana, N.B., Nimrichter, L., Rodrigues, M.L., Garcia, E.S., de  
535 Souza, W., Frases, S., 2012. Capsules from pathogenic and non-pathogenic  
536 *Cryptococcus* spp. manifest significant differences in structure and ability to protect  
537 against phagocytic cells. *PLoS One* 7. <https://doi.org/10.1371/journal.pone.0029561>
- 538 Baker, L.G., Specht, C.A., Lodge, J.K., 2011. Cell wall chitosan is necessary for virulence  
539 in the opportunistic pathogen *Cryptococcus neoformans*. *Eukaryot. Cell* 10, 1264–  
540 1268. <https://doi.org/10.1128/EC.05138-11>
- 541 Baker, R.D., Haugen, R.K., 1955. Tissue changes and tissue diagnosis in Cryptococcosis:  
542 A study of 26 cases. *Am. J. Clin. Pathol.* 25, 14–24.  
543 <https://doi.org/10.1093/ajcp/25.1.14>
- 544 Banks, I.R., Specht, C.A., Donlin, M.J., Gerik, K.J., Levitz, S.M., Lodge, J.K., 2005. A  
545 chitin synthase and its regulator protein are critical for chitosan production and  
546 growth of the fungal pathogen *Cryptococcus neoformans*. *Eukaryot. Cell* 4, 1902–

- 547 1912. <https://doi.org/10.1128/EC.4.11.1902-1912.2005>
- 548 Bassilana, M., Puerner, C., Arkowitz, R.A., 2020. External signal-mediated polarized  
549 growth in fungi. *Curr. Opin. Cell Biol.* 62, 150–158.  
550 <https://doi.org/10.1016/j.ceb.2019.11.001>
- 551 Benchimol, M., Goncalves, N.R., de Souza, W., 1993. Rapid primary microwave-  
552 glutaraldehyde fixation preserves the plasma membrane and intracellular structures  
553 of the protozoan *Tritrichomonas foetus*. *Microsc. Res. Tech.* 25, 286–290.  
554 <https://doi.org/10.1002/jemt.1070250404>
- 555 Bose, I., Reese, A.J., Ory, J.J., Janbon, G., Doering, T.L., 2003. A yeast under Cover: the  
556 capsule of *Cryptococcus neoformans*. *Eukaryot. Cell* 2, 655–663.  
557 <https://doi.org/10.1128/EC.2.4.655-663.2003>
- 558 Boudaoud, A., Burian, A., Borowska-Wykręt, D., Uyttewaal, M., Wrzalik, R.,  
559 Kwiatkowska, D., Hamant, O., 2014. FibrilTool, an ImageJ plug-in to quantify  
560 fibrillar structures in raw microscopy images. *Nat. Protoc.* 9, 457–63.  
561 <https://doi.org/10.1038/nprot.2014.024>
- 562 Bryan, R.A., Zaragoza, O., Zhang, T., Ortiz, G., Casadevall, A., Dadachova, E., 2005.  
563 Radiological studies reveal radial differences in the architecture of the  
564 polysaccharide capsule of *Cryptococcus neoformans*. *Eukaryot. Cell* 4, 465–475.  
565 <https://doi.org/10.1128/EC.4.2.465-475.2005>
- 566 Casadevall, A., Perfect, J.R., 2008. *Cryptococcus neoformans*, in: *Medical Mycology*. pp.  
567 371–371. <https://doi.org/10.1111/j.1365-280X.1999.00238.x>
- 568 Casadevall, A., Pirofski, L., 2007. Accidental virulence, cryptic pathogenesis, martians,  
569 lost hosts, and the pathogenicity of environmental microbes. *Eukaryot. Cell* 6, 2169–  
570 74. <https://doi.org/10.1128/EC.00308-07>
- 571 Cox, G.M., Harrison, T.S., McDade, H.C., Taborda, C.P., Heinrich, G., Casadevall, A.,  
572 Perfect, J.R., 2003. Superoxide dismutase influences the virulence of *Cryptococcus*  
573 *neoformans* by affecting growth within macrophages. *Infect. Immun.* 71, 173–80.  
574 <https://doi.org/10.1128/iai.71.1.173-180.2003>
- 575 Cox, G.M., McDade, H.C., Chen, S.C., Tucker, S.C., Gottfredsson, M., Wright, L.C.,  
576 Sorrell, T.C., Leidich, S.D., Casadevall, A., Ghannoum, M.A., Perfect, J.R., 2001.  
577 Extracellular phospholipase activity is a virulence factor for *Cryptococcus*  
578 *neoformans*. *Mol. Microbiol.* 39, 166–75. <https://doi.org/10.1046/j.1365-2958.2001.02236.x>
- 580 Cox, G.M., Mukherjee, J., Cole, G.T., Casadevall, A., Perfect, J.R., 2000. Urease as a

- 581 virulence factor in experimental cryptococcosis. *Infect. Immun.* 68, 443–448.  
582 <https://doi.org/10.1128/IAI.68.2.443-448.2000>
- 583 Doering, T.L., 2000. How does *Cryptococcus* get its coat? *Trends Microbiol.*  
584 [https://doi.org/10.1016/S0966-842X\(00\)01890-4](https://doi.org/10.1016/S0966-842X(00)01890-4)
- 585 Doering, T.L., Nosanchuk, J.D., Roberts, W.K., Casadevall, A., 1999. Melanin as a  
586 potential cryptococcal defence against microbicidal proteins. *Med. Mycol.* 37, 175–  
587 181. <https://doi.org/10.1046/j.1365-280X.1999.00218.x>
- 588 Dong, Z.M., Murphy, J.W., Zhao Ming Dong, Murphy, J.W., 1995. Effects of the two  
589 varieties of *Cryptococcus neoformans* cells and culture filtrate antigens on  
590 neutrophil locomotion. *Infect. Immun.* 63, 2632–44.
- 591 Eigenheer, R.A., Jin Lee, Y., Blumwald, E., Phinney, B.S., Gelli, A., 2007. Extracellular  
592 glycosylphosphatidylinositol-anchored mannoproteins and proteases of  
593 *Cryptococcus neoformans*. *FEMS Yeast Res.* 7, 499–510.  
594 <https://doi.org/10.1111/j.1567-1364.2006.00198.x>
- 595 Ellis, D.H., Pfeiffer, T.J., 1990. Ecology, life cycle, and infectious propagule of  
596 *Cryptococcus neoformans*. *Lancet* (London, England) 336, 923–5.  
597 [https://doi.org/10.1016/0140-6736\(90\)92283-n](https://doi.org/10.1016/0140-6736(90)92283-n)
- 598 Faganello, J., Arruda, W., Schrank, A., Vainstein, M.H., 2006. An alternative method to  
599 prepare samples of the pathogenic yeast *Cryptococcus neoformans* for scanning  
600 electron microscopy analysis. *J. Microbiol. Methods* 64, 416–419.  
601 <https://doi.org/10.1016/j.mimet.2005.07.003>
- 602 Feldmesser, M., Kress, Y., Casadevall, A., 2001. Dynamic changes in the morphology of  
603 *Cryptococcus neoformans* during murine pulmonary infection. *Microbiology* 147,  
604 2355–2365. <https://doi.org/10.1099/00221287-147-8-2355>
- 605 Fonseca, F.L., Guimarães, A.J., Kmetzsch, L., Dutra, F.F., Silva, F.D., Taborda, C.P.,  
606 Araujo, G. de S., Frases, S., Staats, C.C., Bozza, M.T., Schrank, A., Vainstein, M.H.,  
607 Nimrichter, L., Casadevall, A., Rodrigues, M.L., 2013. Binding of the wheat germ  
608 lectin to *Cryptococcus neoformans* chitoooligomers affects multiple mechanisms  
609 required for fungal pathogenesis. *Fungal Genet. Biol.* 60, 64–73.  
610 <https://doi.org/10.1016/j.fgb.2013.04.005>
- 611 Frases, Susana, Pontes, B., Nimrichter, L., Rodrigues, M.L., Viana, N.B., Casadevall, A.,  
612 2009. The elastic properties of the *Cryptococcus neoformans* capsule. *Biophys. J.*  
613 97, 937–945. <https://doi.org/10.1016/j.bpj.2009.04.043>
- 614 Frases, S., Pontes, B., Nimrichter, L., Viana, N.B., Rodrigues, M.L., Casadevall, A.,

- 615 2009. Capsule of *Cryptococcus neoformans* grows by enlargement of  
616 polysaccharide molecules. *Proc. Natl. Acad. Sci.* 106, 1228–1233.  
617 <https://doi.org/10.1073/pnas.0808995106>
- 618 Free, S.J., 2013. Fungal cell wall organization and biosynthesis. *Adv. Genet.* 81, 33–82.  
619 <https://doi.org/10.1016/B978-0-12-407677-8.00002-6>
- 620 Fries, B.C., Taborda, C.P., Serfass, E., Casadevall, A., 2001. Phenotypic switching of  
621 *Cryptococcus neoformans* occurs in vivo and influences the outcome of infection. *J.*  
622 *Clin. Invest.* 108, 1639–1648. <https://doi.org/10.1172/JCI13407>
- 623 Fu, C., Thielhelm, T.P., Heitman, J., 2019. Unisexual reproduction promotes competition  
624 for mating partners in the global human fungal pathogen *Cryptococcus*  
625 *deneoformans*. *PLOS Genet.* 15, e1008394.  
626 <https://doi.org/10.1371/journal.pgen.1008394>
- 627 Gates, M.A., Kozel, T.R., 2006. Differential localization of complement component 3  
628 within the capsular matrix of *Cryptococcus neoformans*. *Infect. Immun.* 74, 3096–  
629 3106. <https://doi.org/10.1128/IAI.01213-05>
- 630 Gates, M.A., Thorkildson, P., Kozel, T.R., 2004. Molecular architecture of the  
631 *Cryptococcus neoformans* capsule. *Mol. Microbiol.* 52, 13–24.  
632 <https://doi.org/10.1111/j.1365-2958.2003.03957.x>
- 633 Giberson, R.T., Austin, R.L., Charlesworth, J., Adamson, G., Herrera, G.A., 2003.  
634 Microwave and digital imaging technology reduce turnaround times for diagnostic  
635 electron microscopy. *Ultrastruct. Pathol.* 27, 187–196.  
636 <https://doi.org/10.1080/01913120309937>
- 637 Giles, S.S., Dagenais, T.R.T., Botts, M.R., Keller, N.P., Hull, C.M., 2009. Elucidating  
638 the pathogenesis of spores from the human fungal pathogen *Cryptococcus*  
639 *neoformans*. *Infect. Immun.* 77, 3491–3500. <https://doi.org/10.1128/IAI.00334-09>
- 640 Goldman, D.L., Fries, B.C., Franzot, S.P., Montella, L., Casadevall, A., 1998. Phenotypic  
641 switching in the human pathogenic fungus *Cryptococcus neoformans* is associated  
642 with changes in virulence and pulmonary inflammatory response in rodents. *Proc.*  
643 *Natl. Acad. Sci. U. S. A.* 95, 14967–72. <https://doi.org/10.1073/pnas.95.25.14967>
- 644 Goldman, J.D., Vollmer, M.E., Luks, A.M., 2010. Cryptococcosis in the  
645 immunocompetent patient. *Respir. Care* 55, 1499–503.
- 646 Gómez, B.L., Nosanchuk, J.D., 2003. Melanin and fungi. *Curr. Opin. Infect. Dis.* 16, 91–  
647 6. <https://doi.org/10.1097/00001432-200304000-00005>
- 648 Gooday, G.W., 1995. *The growing fungus*. Springer US.

- 649 Henao-Martínez, A.F., Beckham, J.D., 2015. Cryptococcosis in solid organ transplant  
650 recipients. *Curr. Opin. Infect. Dis.* 28, 300–7.  
651 <https://doi.org/10.1097/QCO.0000000000000171>
- 652 Huffnagle, G.B., Chen, G.-H., Curtis, J.L., McDonald, R.A., Strieter, R.M., Toews, G.B.,  
653 1995. Down-regulation of the afferent phase of T cell-mediated pulmonary  
654 inflammation and immunity by a high melanin-producing strain of *Cryptococcus*  
655 *neoformans*. *J. Immunol.*
- 656 James, P.G., Cherniak, R., Jones, R.G., Stortz, C.A., Reiss, E., 1990. Cell-wall glucans  
657 of *Cryptococcus neoformans* CAP 67. *Carbohydr. Res.* 198, 23–38.  
658 [https://doi.org/10.1016/0008-6215\(90\)84273-W](https://doi.org/10.1016/0008-6215(90)84273-W)
- 659 Kozel, T.R., Gulley, W.F., Cazin, J., 1977. Immune response to *Cryptococcus*  
660 *neoformans* soluble polysaccharide: Immunological unresponsiveness. *Infect.*  
661 *Immun.* 18, 701–707.
- 662 Kremer, J.R., Mastronarde, D.N., McIntosh, J.R., 1996. Computer Visualization of  
663 Three-Dimensional Image Data Using IMOD. *J. Struct. Biol.* 116, 71–76.  
664 <https://doi.org/10.1006/jsbi.1996.0013>
- 665 Kupfer, A., Swain, S.L., Janeway, C.A., Singer, S.J., 1986. The specific direct interaction  
666 of helper T cells and antigen-presenting B cells. *Proc. Natl. Acad. Sci.* 83, 6080–  
667 6083. <https://doi.org/10.1073/pnas.83.16.6080>
- 668 Larsen, R.A., Pappas, P.G., Perfect, J., Aberg, J.A., Casadevall, A., Cloud, G.A., James,  
669 R., Filler, S., Dismukes, W.E., 2005. Phase I evaluation of the safety and  
670 pharmacokinetics of murine-derived anticryptococcal antibody 18B7 in subjects  
671 with treated cryptococcal meningitis. *Antimicrob. Agents Chemother.* 49, 952–958.  
672 <https://doi.org/10.1128/AAC.49.3.952-958.2005>
- 673 Lee, D.-J., Bahn, Y.-S., Kim, H.-J., Chung, S.-Y., Kang, H.A., 2015. Unraveling the novel  
674 structure and biosynthetic pathway of O-linked glycans in the Golgi apparatus of the  
675 human pathogenic yeast *Cryptococcus neoformans*. *J. Biol. Chem.* 290, 1861–73.  
676 <https://doi.org/10.1074/jbc.M114.607705>
- 677 Levitz, S.M., Specht, C.A., 2006. The molecular basis for the immunogenicity of  
678 *Cryptococcus neoformans* mannoproteins. *FEMS Yeast Res.* 6, 513–524.  
679 <https://doi.org/10.1111/j.1567-1364.2006.00071.x>
- 680 Liao, T.-L., Chen, Y.-M., Chen, D.-Y., 2016. Risk factors for cryptococcal infection  
681 among patients with rheumatoid arthritis receiving different immunosuppressive  
682 medications. *Clin. Microbiol. Infect.* 22, 815.e1-815.e3.



- 683 <https://doi.org/10.1016/j.cmi.2016.05.030>
- 684 Lin, X., Alspaugh, J.A., Liu, H., Harris, S., 2014. Fungal morphogenesis. *Cold Spring*  
685 *Harb. Perspect. Med.* 5, a019679. <https://doi.org/10.1101/cshperspect.a019679>
- 686 Liu, L., Tewari, R.P., Williamson, P.R., 1999. Laccase protects *Cryptococcus*  
687 *neoformans* from antifungal activity of alveolar macrophages. *Infect. Immun.* 67,  
688 6034–9.
- 689 Macher, A.M., Bennett, J.E., Gadek, J.E., Frank, M.M., 1978. Complement depletion in  
690 cryptococcal sepsis. *J. Immunol.* 120, 1686–1690.
- 691 Madden, K., Snyder, M., 1998. Cell polarity and morphogenesis in budding yeast. *Annu.*  
692 *Rev. Microbiol.* 52, 687–744. <https://doi.org/10.1146/annurev.micro.52.1.687>
- 693 Manners, D.J., Masson, A.J., Patterson, J.C., Björndal, H., Lindberg, B., 1973. The  
694 structure of a beta-(1-6)-D-glucan from yeast cell walls. *Biochem. J.* 135, 31–6.  
695 <https://doi.org/10.1042/bj1350031>
- 696 Mastronarde, D.N., 1997. Dual-Axis tomography: An Approach with Alignment  
697 Methods That Preserve Resolution. *J. Struct. Biol.* 120, 343–352.  
698 <https://doi.org/10.1006/jsbi.1997.3919>
- 699 McFadden, D., Zaragoza, O., Casadevall, A., 2006. The capsular dynamics of  
700 *Cryptococcus neoformans*. *Trends Microbiol.* 14, 497–505.  
701 <https://doi.org/10.1016/j.tim.2006.09.003>
- 702 McFadden, D.C., De Jesus, M., Casadevall, A., 2006. The physical properties of the  
703 capsular polysaccharides from *Cryptococcus neoformans* suggest features for  
704 capsule construction. *J. Biol. Chem.* 281, 1868–1875.  
705 <https://doi.org/10.1074/jbc.M509465200>
- 706 Mitchell, D.H., Sorrell, T.C., Allworth, A.M., Heath, C.H., McGregor, A.R., Papanoum,  
707 K., Richards, M.J., Gottlieb, T., 1995. Cryptococcal disease of the CNS in  
708 immunocompetent hosts: influence of cryptococcal variety on clinical  
709 manifestations and outcome. *Clin. Infect. Dis.* 20, 611–6.  
710 <https://doi.org/10.1093/clinids/20.3.611>
- 711 Mooseker, M.S., 1985. Organization, chemistry, and assembly of the cytoskeletal  
712 apparatus of the intestinal brush border. *Annu. Rev. Cell Biol.* 1, 209–41.  
713 <https://doi.org/10.1146/annurev.cb.01.110185.001233>
- 714 Murakami, T., Iida, N., Taguchi, T., Ohtani, O., Kikuta, A., Ohtsuka, A., Itoshima, T.,  
715 1983. Conductive staining of biological specimens for scanning electron microscopy  
716 with special reference to ligand-mediated osmium impregnation. *Scan. Electron*



- 717 Microsc. 235–46.
- 718 Murphy, J.W., Cozad, G.C., 1972. Immunological unresponsiveness induced by  
719 cryptococcal capsular polysaccharide assayed by the hemolytic plaque technique.  
720 Infect. Immun. 5, 896–901.
- 721 O’Meara, T.R., Alspaugh, J.A., 2012. The *Cryptococcus neoformans* capsule: a sword  
722 and a shield. Clin. Microbiol. Rev. 25, 387–408.  
723 <https://doi.org/10.1128/CMR.00001-12>
- 724 Okagaki, L.H., Strain, A.K., Nielsen, J.N., Charlier, C., Baltes, N.J., Chrétien, F.,  
725 Heitman, J., Dromer, F., Nielsen, K., 2010. Cryptococcal cell morphology affects  
726 host cell interactions and pathogenicity. PLoS Pathog. 6, e1000953.  
727 <https://doi.org/10.1371/journal.ppat.1000953>
- 728 Park, B.J., Wannemuehler, K.A., Marston, B.J., Govender, N., Pappas, P.G., Chiller,  
729 T.M., 2009. Estimation of the current global burden of cryptococcal meningitis  
730 among persons living with HIV/AIDS. AIDS 23, 525–30.  
731 <https://doi.org/10.1097/QAD.0b013e328322ffac>
- 732 Park, J.-N., Lee, D.-J., Kwon, O., Oh, D.-B., Bahn, Y.-S., Kang, H.A., 2012. Unraveling  
733 unique structure and biosynthesis pathway of N-linked glycans in human fungal  
734 pathogen *Cryptococcus neoformans* by glycomics analysis. J. Biol. Chem. 287,  
735 19501–15. <https://doi.org/10.1074/jbc.M112.354209>
- 736 Perfect, J.R., 2013. Fungal diagnosis: how do we do it and can we do better? Curr. Med.  
737 Res. Opin. 29 Suppl 4, 3–11. <https://doi.org/10.1185/03007995.2012.761134>
- 738 Perfect, J.R., Casadevall, A., 2011. *Cryptococcus*. American Society of Microbiology.  
739 <https://doi.org/10.1128/9781555816858>
- 740 Pontes, B., Frases, S., 2015. The *Cryptococcus neoformans* capsule: Lessons from the use  
741 of optical tweezers and other biophysical tools. Front. Microbiol. 6, 640.  
742 <https://doi.org/10.3389/fmicb.2015.00640>
- 743 Reese, A.J., Doering, T.L., 2003. Cell wall  $\alpha$ -1,3-glucan is required to anchor the  
744 *Cryptococcus neoformans* capsule. Mol. Microbiol. 50, 1401–1409.  
745 <https://doi.org/10.1046/j.1365-2958.2003.03780.x>
- 746 Reilly, M.C., Aoki, K., Wang, Z.A., Skowyra, M.L., Williams, M., Tiemeyer, M.,  
747 Doering, T.L., 2011. A xylosylphosphotransferase of *Cryptococcus neoformans* acts  
748 in protein O-glycan synthesis. J. Biol. Chem. 286, 26888–99.  
749 <https://doi.org/10.1074/jbc.M111.262162>
- 750 Retini, C., Vecchiarelli, A., Monari, C., Bistoni, F., Kozel, T.R., 1998. Encapsulation of

- 751 *Cryptococcus neoformans* with glucuronoxylomannan inhibits the antigen-  
752 presenting capacity of monocytes. *Infect. Immun.* 66, 664–9.
- 753 Rodrigues, M.L., Dobroff, A.S.S., Couceiro, J.N. dos S.S., Alviano, C.S., Schauer, R.,  
754 Travassos, L.R., 2002. Sialylglycoconjugates and sialyltransferase activity in the  
755 fungus *Cryptococcus neoformans*. *Glycoconj. J.* 19, 165–73.  
756 <https://doi.org/10.1023/A:1024245606607>
- 757 Rodrigues, M.L., Fonseca, F.L., Frases, S., Casadevall, A., Nimrichter, L., 2009. The still  
758 obscure attributes of cryptococcal glucuronoxylomannan. *Med. Mycol.* 47, 783–8.  
759 <https://doi.org/10.3109/13693780902788621>
- 760 Rodrigues, M.L., Nimrichter, L., Oliveira, D.L., Frases, S., Miranda, K., Zaragoza, O.,  
761 Alvarez, M., Nakouzi, A., Feldmesser, M., Casadevall, A., 2007. Vesicular  
762 polysaccharide export in *Cryptococcus neoformans* is a eukaryotic solution to the  
763 problem of fungal trans-cell wall transport. *Eukaryot. Cell* 6, 48–59.  
764 <https://doi.org/10.1128/EC.00318-06>
- 765 Roncero, C., 2002. The genetic complexity of chitin synthesis in fungi. *Curr. Genet.* 41,  
766 367–78. <https://doi.org/10.1007/s00294-002-0318-7>
- 767 Ruiz-Herrera, J., González-Prieto, J.M., Ruiz-Medrano, R., 2002. Evolution and  
768 phylogenetic relationships of chitin synthases from yeasts and fungi. *FEMS Yeast*  
769 *Res.* 1, 247–56. <https://doi.org/10.1111/j.1567-1364.2002.tb00042.x>
- 770 Sakaguchi, N., Baba, T., Fukuzawa, M., Ohno, S., 1993. Ultrastructural study of  
771 *Cryptococcus neoformans* by quick-freezing and deep-etching method.  
772 *Mycopathologia* 121, 133–141. <https://doi.org/10.1007/BF01104068>
- 773 Schneider, C.A., Rasband, W.S., Eliceiri, K.W., 2012. NIH image to ImageJ: 25 years of  
774 image analysis. *Nat. Methods* 9, 671–675. <https://doi.org/10.1038/nmeth.2089>
- 775 Seligman, A.M., Wasserkrug, H.L., Hanker, J.S., 1966. A new staining method (OTO)  
776 for enhancing contrast of lipid-containing membranes and droplets in osmium  
777 tetroxide-fixed tissue with osmiophilic thiocarbohydrazide (TCH). *J. Cell Biol.* 30,  
778 424–32. <https://doi.org/10.1083/jcb.30.2.424>
- 779 Shadomy, H.J., Utz, J.P., 1966. Preliminary studies on a hyphaforming mutant of  
780 *Cryptococcus neoformans*. *Mycologia* 58, 383–90.
- 781 Singh, N., Dromer, F., Perfect, J.R., Lortholary, O., 2008. Cryptococcosis in solid organ  
782 transplant recipients: current state of the science. *Clin. Infect. Dis.* 47, 1321–7.  
783 <https://doi.org/10.1086/592690>
- 784 Trevijano-Contador, N., de Oliveira, H.C., García-Rodas, R., Rossi, S.A., Llorente, I.,

- 785 Zaballos, Á., Janbon, G., Ariño, J., Zaragoza, Ó., 2018. *Cryptococcus neoformans*  
786 can form titan-like cells in vitro in response to multiple signals. *PLoS Pathog.* 14,  
787 e1007007. <https://doi.org/10.1371/journal.ppat.1007007>
- 788 Velagapudi, R., Hsueh, Y.-P., Geunes-Boyer, S., Wright, J.R., Heitman, J., 2009. Spores  
789 as infectious propagules of *Cryptococcus neoformans*. *Infect. Immun.* 77, 4345–55.  
790 <https://doi.org/10.1128/IAI.00542-09>
- 791 Wang, Y., Aisen, P., Casadevall, A., 1995. *Cryptococcus neoformans* melanin and  
792 virulence: mechanism of action. *Infect. Immun.* 63, 3131–6.
- 793 Wang, Z.A., Li, L.X., Doering, T.L., 2018. Unraveling synthesis of the cryptococcal cell  
794 wall and capsule. *Glycobiology* 28, 719–730.  
795 <https://doi.org/10.1093/glycob/cwy030>
- 796 Willingham, M.C., Rutherford, A. V, 1984. The use of Osmium-Thiocarbohydrazide-  
797 Osmium (OTO) and ferrocyanide-reduced osmium methods to enhance membrane  
798 contrast and preservation in cultured cells. *J. Histochem. Cytochem.* 32, 455–460.  
799 <https://doi.org/10.1177/32.4.6323574>
- 800 Zaragoza, O., 2019. Basic principles of the virulence of *Cryptococcus*. *Virulence* 10, 490–  
801 501. <https://doi.org/10.1080/21505594.2019.1614383>
- 802 Zaragoza, O., Chrisman, C.J., Castelli, M.V., Frases, S., Cuenca-Estrella, M., Rodríguez-  
803 Tudela, J.L., Casadevall, A., 2008. Capsule enlargement in *Cryptococcus*  
804 *neoformans* confers resistance to oxidative stress suggesting a mechanism for  
805 intracellular survival. *Cell. Microbiol.* 10, 2043–57. <https://doi.org/10.1111/j.1462-5822.2008.01186.x>
- 807 Zaragoza, O., Fries, B.C., Casadevall, A., 2003. Induction of capsule growth in  
808 *Cryptococcus neoformans* by mammalian serum and CO<sub>2</sub>. *Infect. Immun.* 71,  
809 6155–64. <https://doi.org/10.1128/iai.71.11.6155-6164.2003>
- 810 Zaragoza, O., McClelland, E.E., Telzak, A., Casadevall, A., 2006a. Equatorial ring-like  
811 channels in the *Cryptococcus neoformans* polysaccharide capsule. *FEMS Yeast Res.*  
812 6, 662–6. <https://doi.org/10.1111/j.1567-1364.2006.00070.x>
- 813 Zaragoza, O., Nielsen, K., 2013. Titan cells in *Cryptococcus neoformans*: cells with a  
814 giant impact. *Curr. Opin. Microbiol.* 16, 409–13.  
815 <https://doi.org/10.1016/j.mib.2013.03.006>
- 816 Zaragoza, O., Rodrigues, M.L., De Jesus, M., Frases, S., Dadachova, E., Casadevall, A.,  
817 2009. The capsule of the fungal pathogen *Cryptococcus neoformans*. *Adv. Appl.*  
818 *Microbiol.* 68, 133–216. [https://doi.org/10.1016/S0065-2164\(09\)01204-0](https://doi.org/10.1016/S0065-2164(09)01204-0)

819 Zaragoza, O., Telzak, A., Bryan, R.A., Dadachova, E., Casadevall, A., 2006b. The  
820 polysaccharide capsule of the pathogenic fungus *Cryptococcus neoformans* enlarges  
821 by distal growth and is rearranged during budding. *Mol. Microbiol.* 59, 67–83.  
822 <https://doi.org/10.1111/j.1365-2958.2005.04928.x>

823 Zhao, Y., Lin, J., Fan, Y., Lin, X., 2019. Life cycle of *Cryptococcus neoformans*. *Annu.*  
824 *Rev. Microbiol.* 73, 17–42. <https://doi.org/10.1146/annurev-micro-020518-120210>

825  
826

## 827 **9. Figure Legends**

828

829 **Figure 1: Selected images from a video microscopy movie of *C. neoformans*, grown**  
830 **in Sabouraud medium, showing budding evolution.** A-D) Snapshots taken at 0,  
831 1h07min, 02h12min and 03h21min, respectively, showing how the budding events evolve  
832 with time. Green arrowheads indicate yeasts during the division process that takes  
833 approximately  $(1.3 \pm 0.3)$  h / cell. They also show that daughter cells always bud  
834 unipolarly and repeatedly from the same cell region. G1 indicates first generation cells,  
835 G1.1 daughter cell from the first generation, the other numbers follow a similar logic.  
836 Scale bar is 5  $\mu\text{m}$ . (Supplementary video 1).

837

838 **Figure 2: Conventional fluorescence microscopy images of *C. neoformans* stained**  
839 **with Uvitex2D depicting chitin polymers at the cell wall.** A) Fixed and stained *C.*  
840 *neoformans* with chitin labeled in blue. Notice the discontinuity of the cell wall staining  
841 (red arrow). Those are the specialized regions (SR) in yeasts. B) Grey scale image of A.  
842 C1, C2 and C3 are cells that are under different budding stages (see red arrows). C) Zoom  
843 of C1, C2 and C3 (upper panel) with their respective 3D surface plots (lower panel).  
844 Surface plots indicate that the cell walls in SRs have a lower fluorescence intensity when  
845 compared to the entire cell wall rims. Scale bars are all 10  $\mu\text{m}$ .

846

847 **Figure 3: SIM images of *C. neoformans* confirm that both the cell wall and capsule**  
848 **deform prior to the budding event and generation of daughter cells.** Yeast cells were  
849 fixed and stained for Uvitex2B (blue) and 18B7 antibody (red) so we could follow their  
850 walls and PS capsules, respectively, during budding and generation of daughter cells. A)  
851 2.5D yeast profile, showing that the mother cell (left) has a higher cell wall fluorescence  
852 intensity when compared to the daughter cell (right). B) 2D representation of the same

853 field as in A. **C)** Representative image of a yeast cell at the beginning of the budding  
854 process. SR can be visualized as a discontinuity of the cell wall. **D)** 3D profile of a  
855 representative yeast cell also in the beginning of the budding process showing the SR.  
856 Scale bars: A 1  $\mu\text{m}$ . B, C and D 2  $\mu\text{m}$ . (Supplementary video 2).

857

858 **Figure 4: Transmission electron microscopy of *C. neoformans* during budding**  
859 **reveals that both the cell wall and PS layer reorganize prior to budding.** The right  
860 column images (B, C, F) are zoomed images of the panels represented on the left. The  
861 green arrowheads indicate the cell wall delamination at different budding stages. **A - B)**  
862 Yeast in the beginning of the budding process presents a modest cell wall (CW)  
863 delamination in the specialized region (SR). **C - D)** Intermediate cell wall delamination  
864 stage and reduction of the PS fiber density at the SR when compared to the rest of the cell  
865 perimeter. **E - F)** Discontinuity of the cell wall showing an advanced delamination step  
866 in which the cell wall peeling is evident, resembling a “wafer cookie”, and the reduction  
867 of the density and complexity of the PS fibers around the SR is evident. **LBs:** Lipid  
868 Bodies; **CW:** Cell Wall; **PS:** Polysaccharide; **SR:** Specialized region. Scale bars: A, C  
869 and E 1  $\mu\text{m}$  ; B, D and F 500 nm.

870

871 **Figure 5: Serial electron tomography and three-dimensional reconstruction of *C.***  
872 ***neoformans* show ultrastructural details of the budding process.** **A – C)** Different z-  
873 planes of a serial tomogram of a budding event. The green arrowheads point to the cell  
874 wall delamination along different image planes. **D)** Virtual plane of the tomogram where  
875 the 3D model was superimposed to highlight the structures that participate and are  
876 remodeled in the SR. The upper left cell is the mother cell while the bottom right one is  
877 the daughter cell. **E1-5)** Set of sequential slices from the tomogram evidencing the  
878 modifications in cell wall cohesion along different angles. Note the presence of a  
879 multilamellar membrane and vesicles in synergism with the PSs surrounding the SRs,  
880 which probably acts as a shield. **F and G)** Different views of the three-dimensional model  
881 from the daughter cell perspective. In **F** we see a front view of the daughter cell wall  
882 discontinuity at the region of budding. This region is sealed by several membrane profiles  
883 as show in E. In G, a top view of the model where membrane profiles can be seen in  
884 between the CW and the cell membrane. Several vesicles (asterisk) could be seen inside  
885 the membrane profiles (dark blue) and also between CW and cell membrane (red and

886 brown). **LBs:** Lipid Bodies; **CW:** Cell Wall; **PS:** Polysaccharide; **SR:** Specialized region.

887 Scale bars are all 100 nm. (Supplementary video 3).

888

889 **Figure 6: Scanning electron microscopy images of *C. neoformans* showing the**

890 **alignment of the PS fibers toward the budding region. A - E)** Different examples

891 showing changes in the spatial and conformational orientation of the PS capsule in the

892 SR. Scale bars: A, B and E 2  $\mu\text{m}$ ; C and D 5  $\mu\text{m}$ . **F)** Plot of the mean anisotropy values of

893 PS fibers around SRs (grey) and outside SRs (black). At least 25 different measurements

894 were performed for each experimental situation. Standard error was used as error bars.

895 \*\*\*\* means  $p < 0.0001$  in Student's *t*-test statistics.

896

897

## 898 **10. Supplementary Material Legends**

899

900 **Supplementary video 1:** Budding phenomena observed in a representative *C.*

901 *neoformans* cell culture (related to Figure 1).

902

903 **Supplementary video 2:** 3D-SIM reconstruction of a representative *C. neoformans* cell

904 in the beginning of the budding process showing the SR (related to Figure 3D).

905

906 **Supplementary video 3:** Set of electron tomography planes showing *C. neoformans*

907 mother and daughter cells during a budding process (related to Figure 5E).



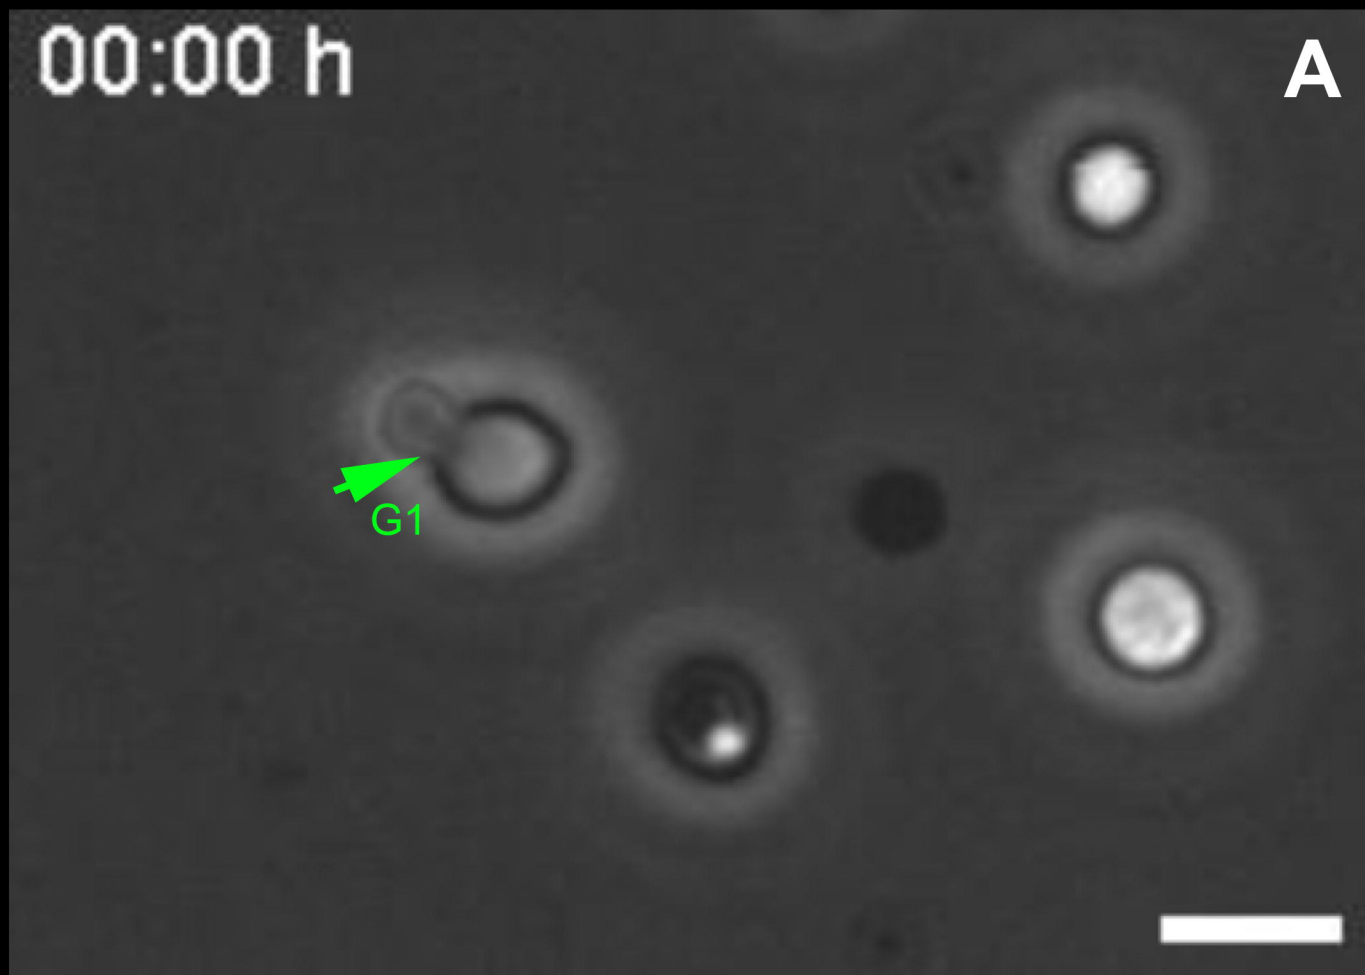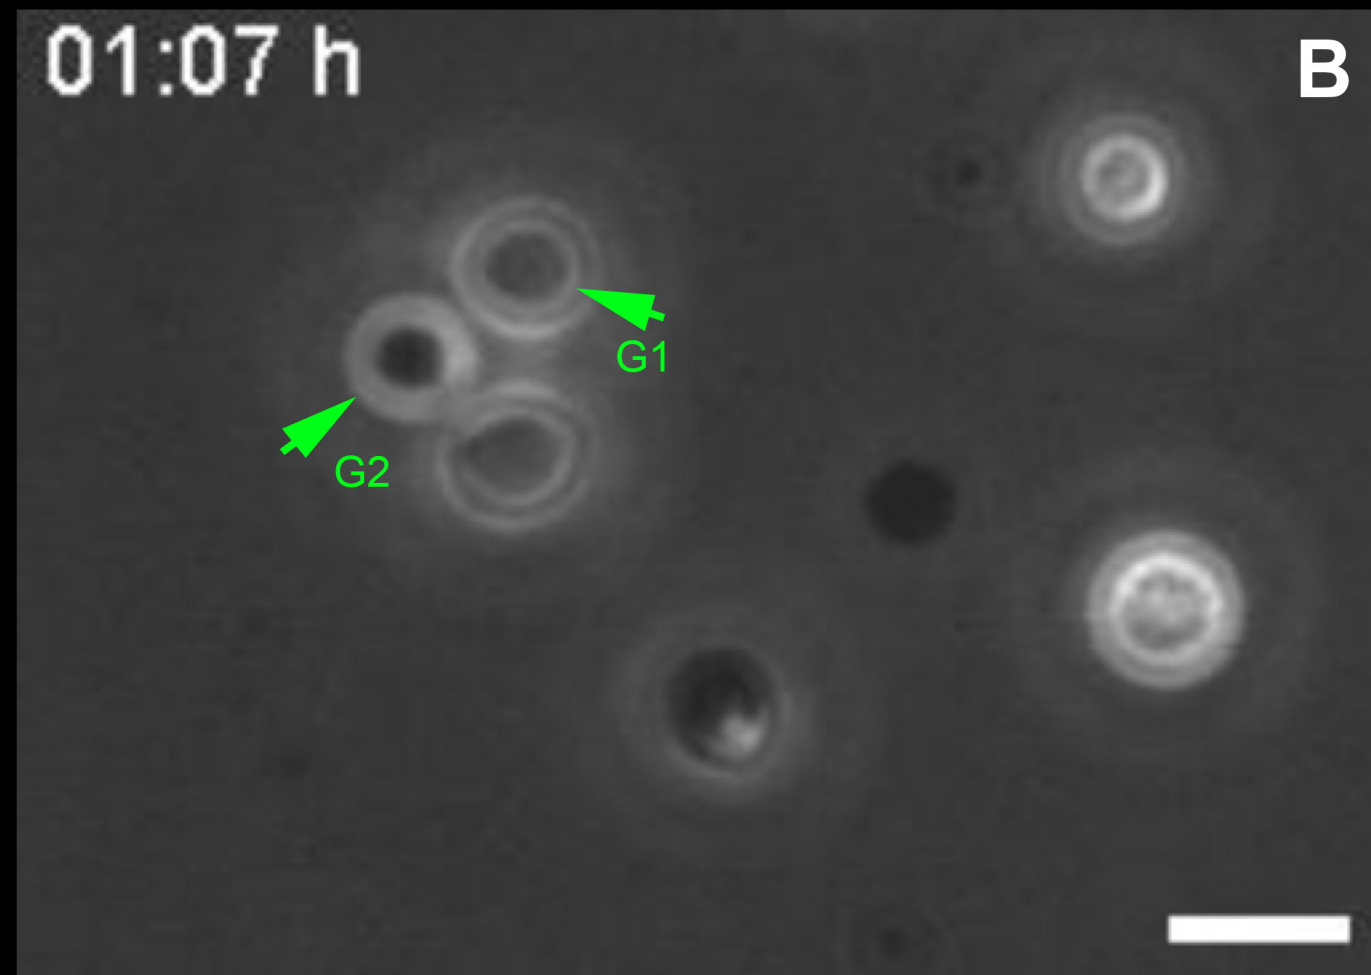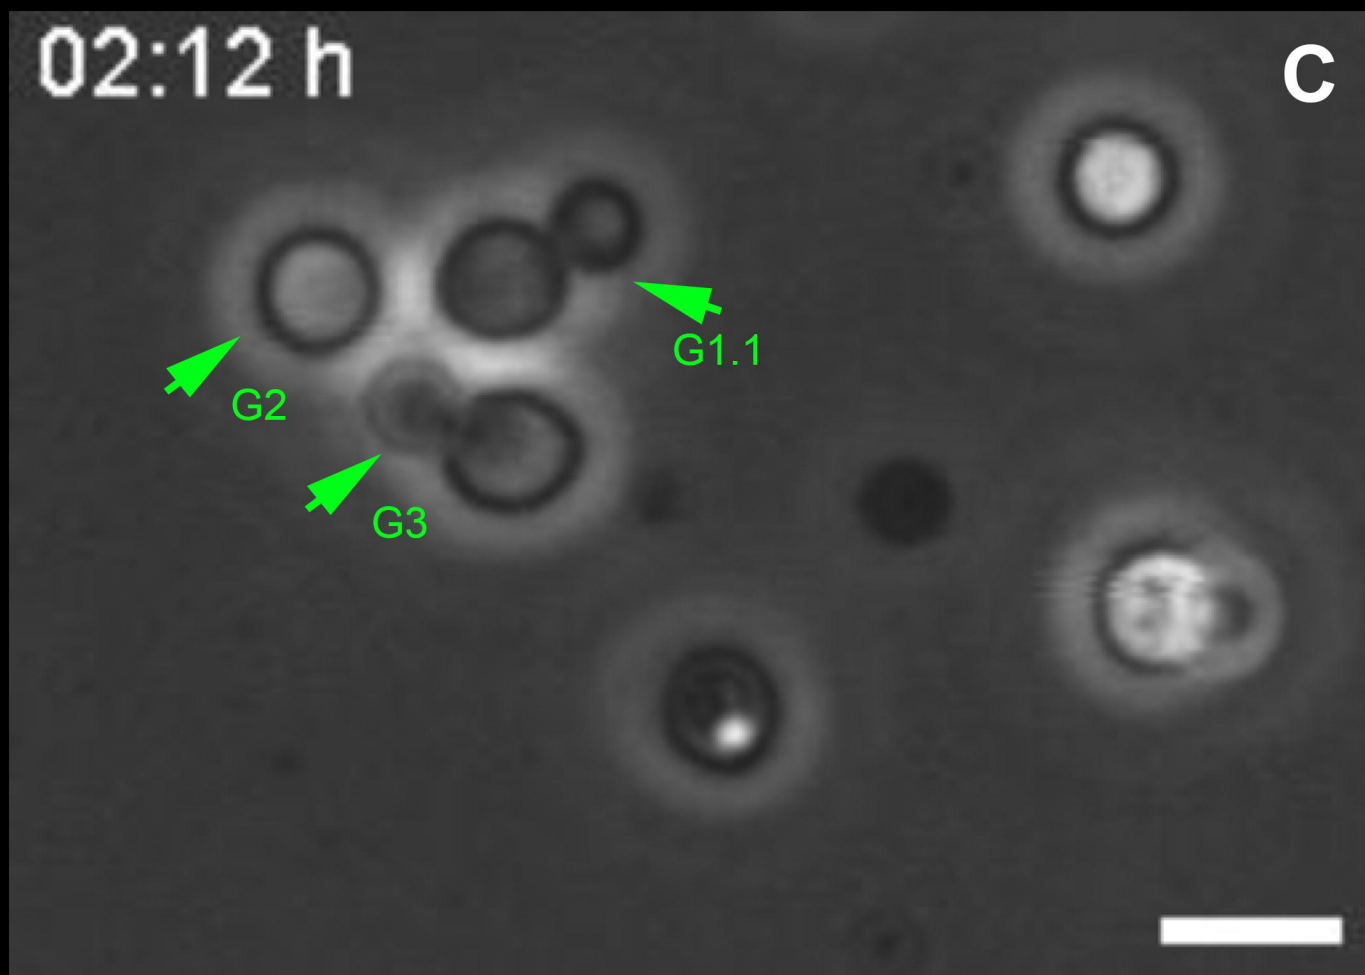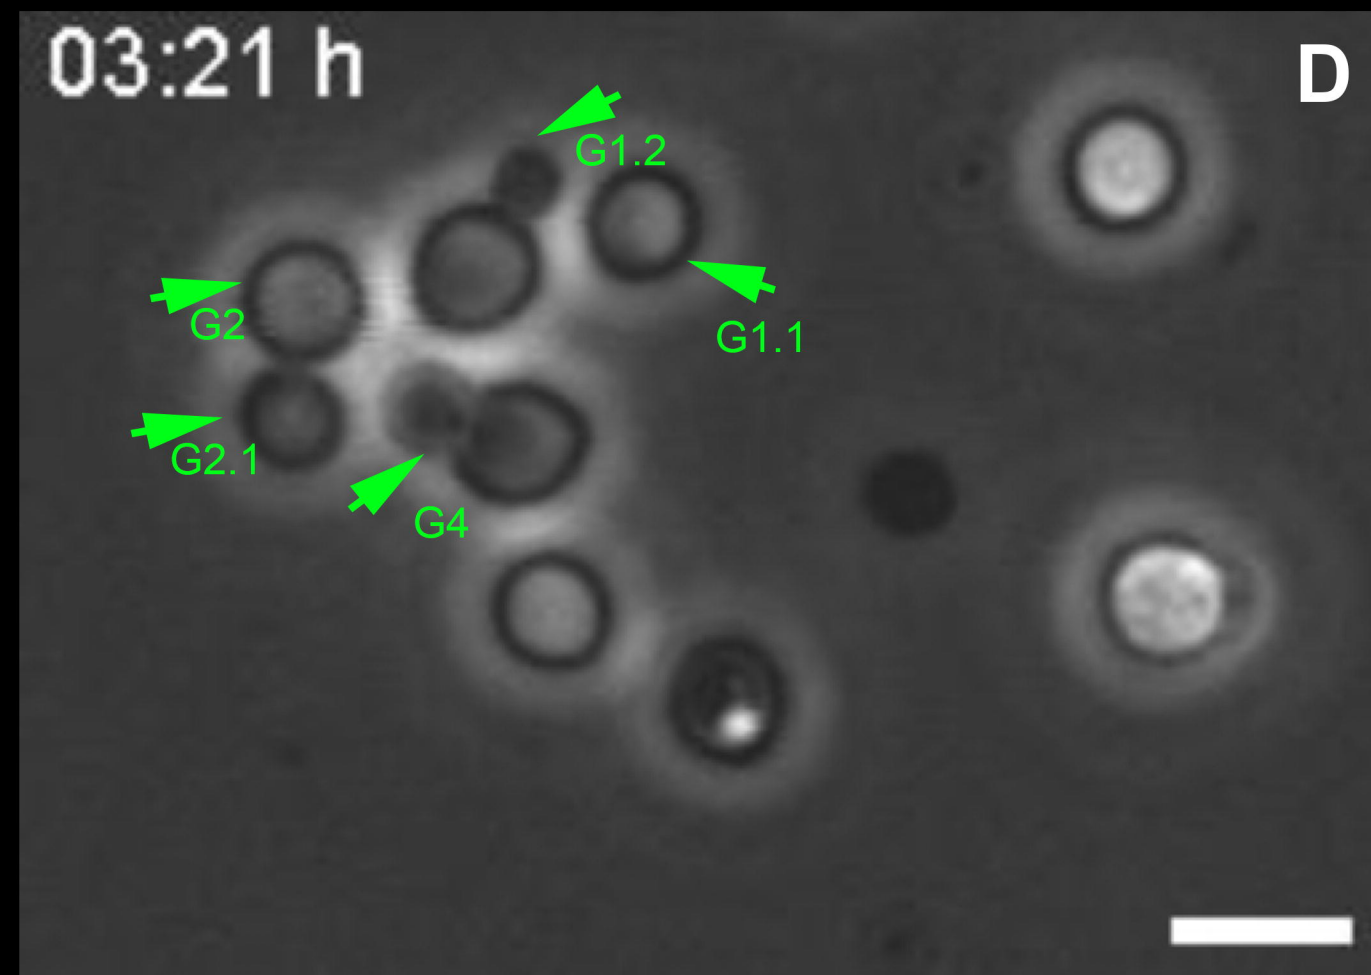



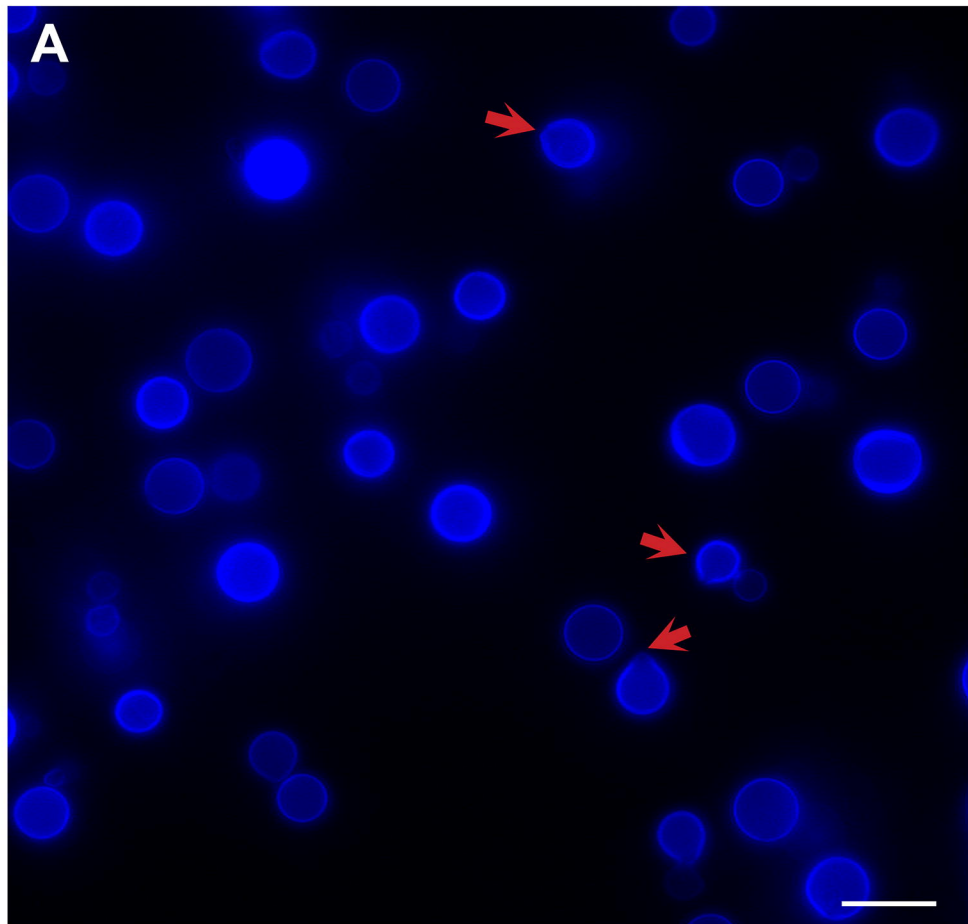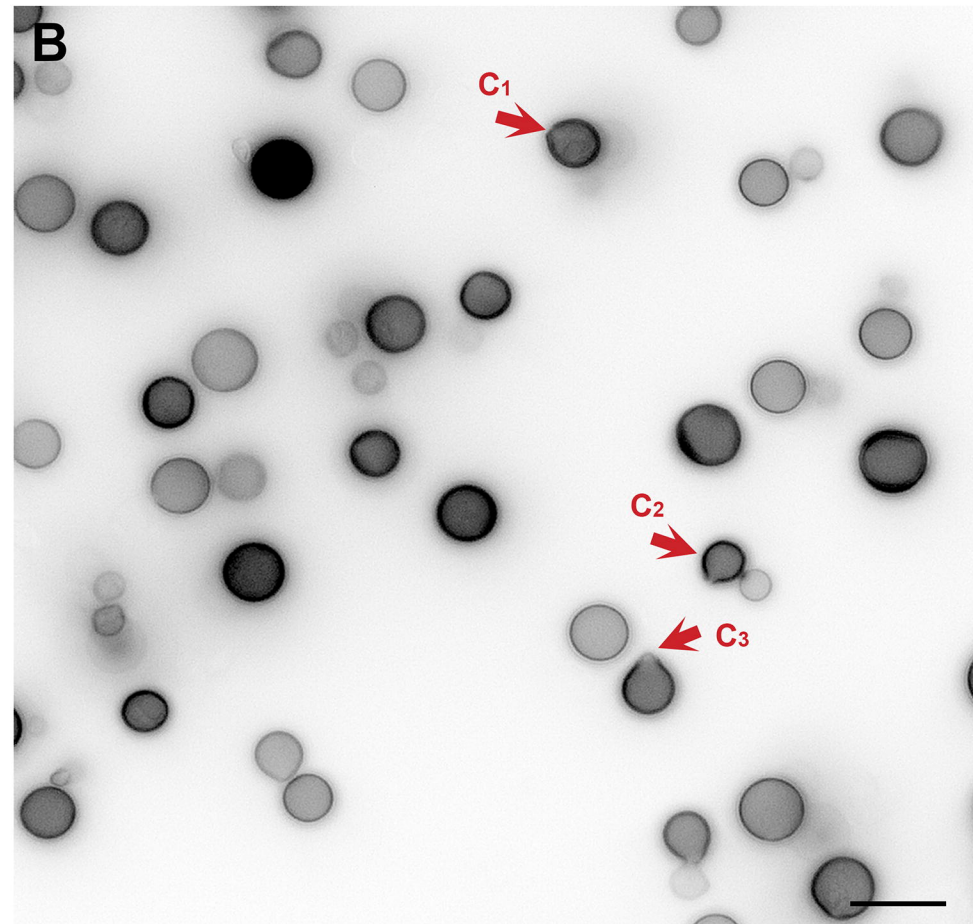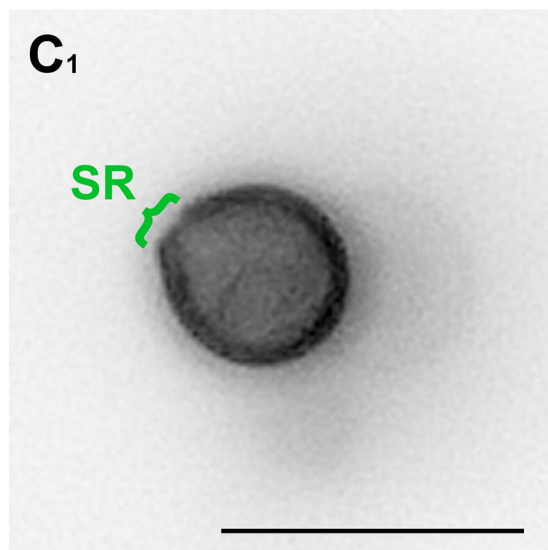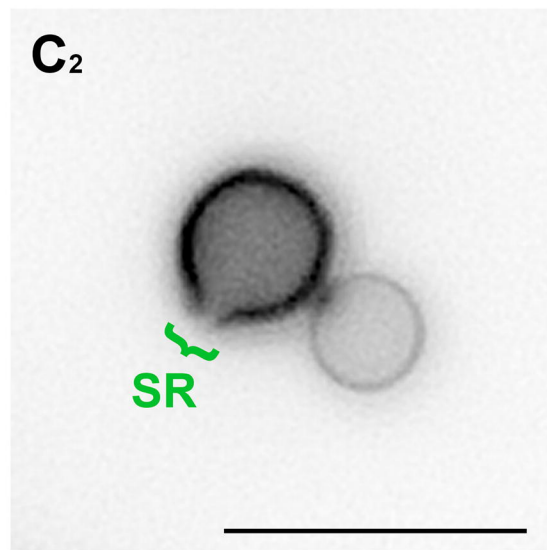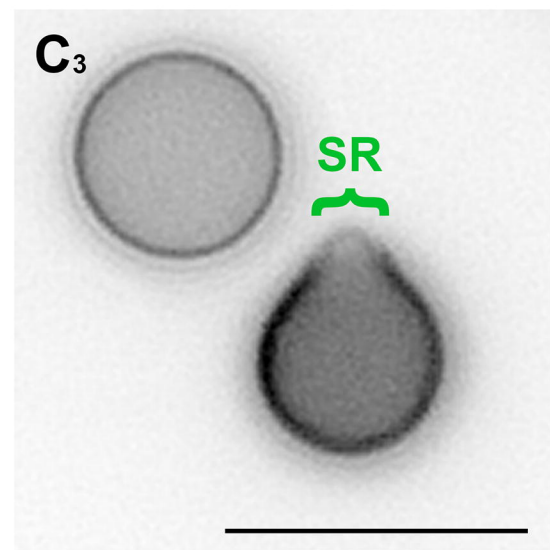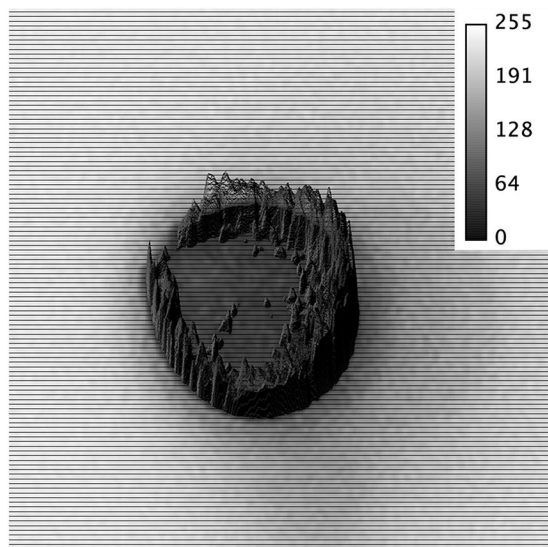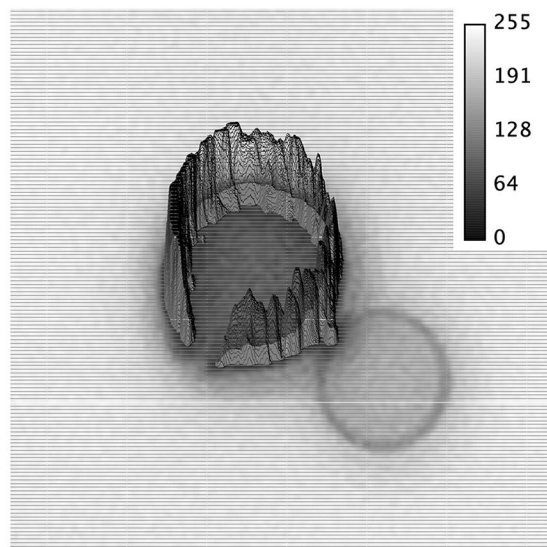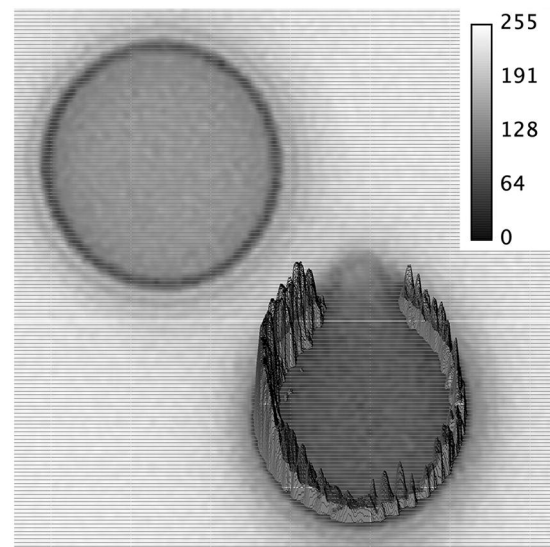

**A**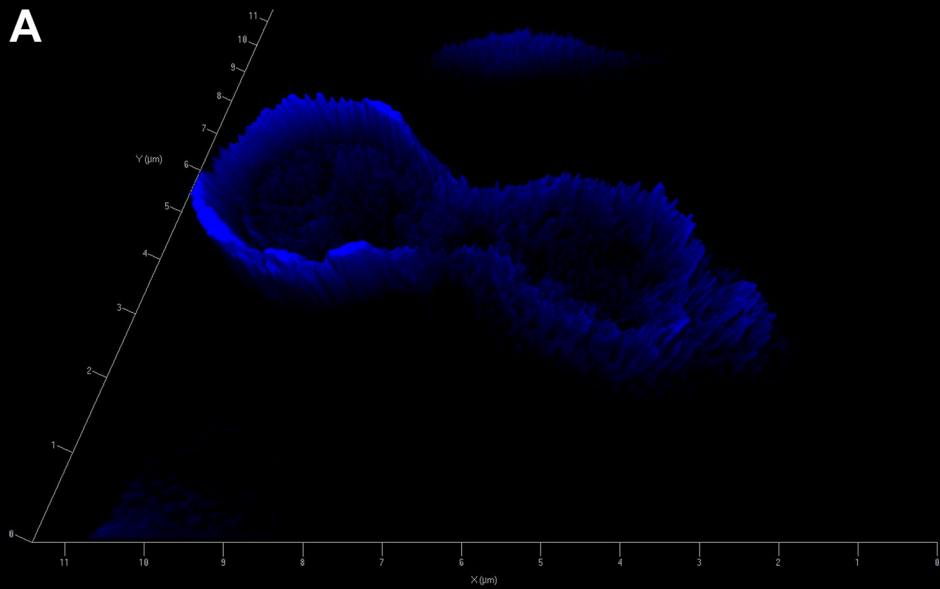**B**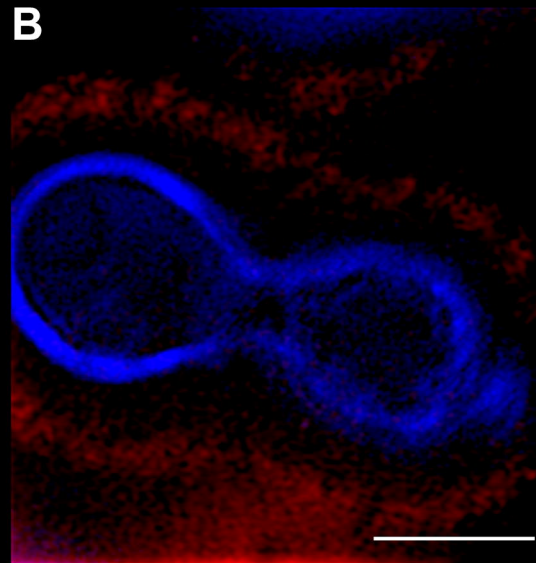**C**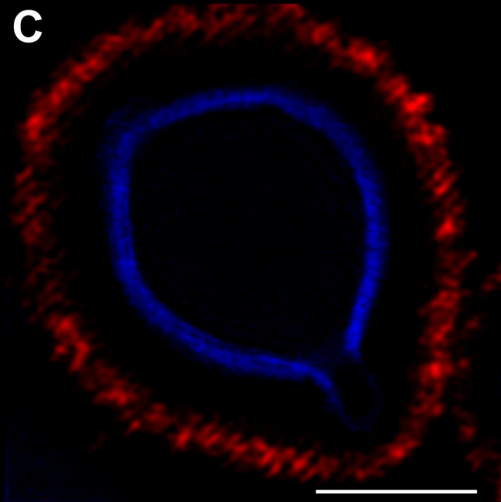**D**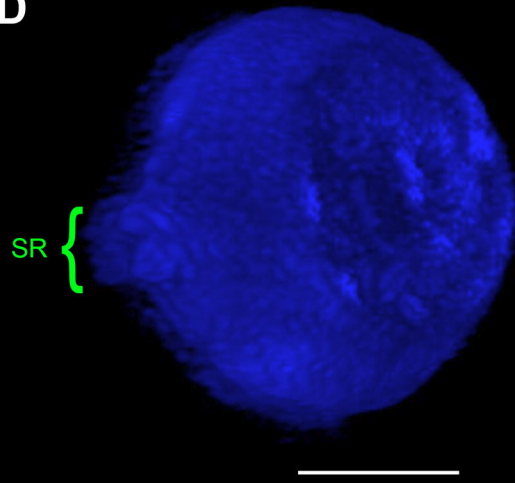



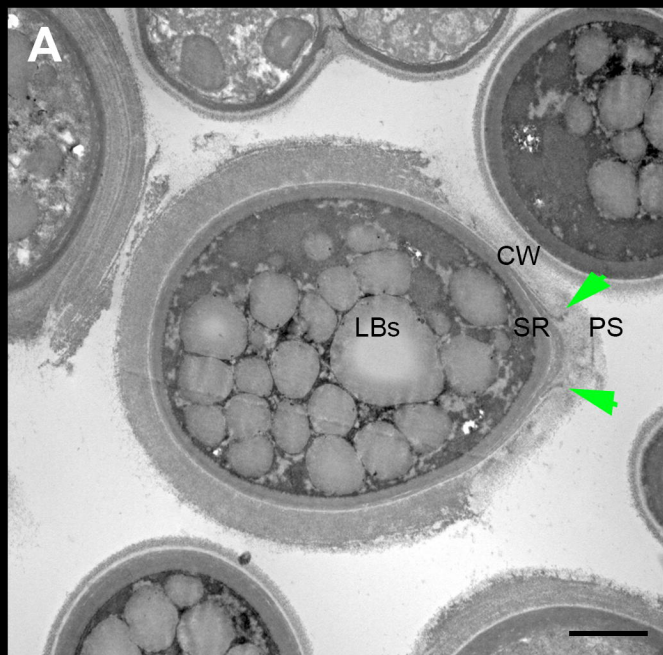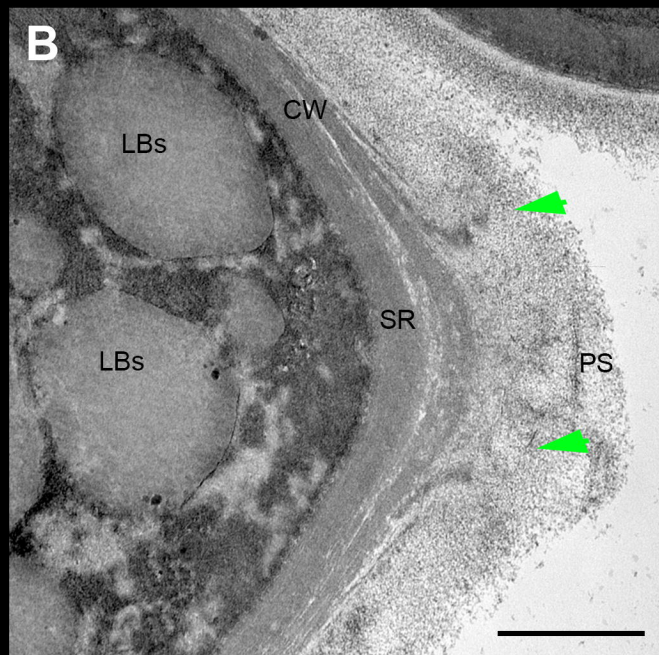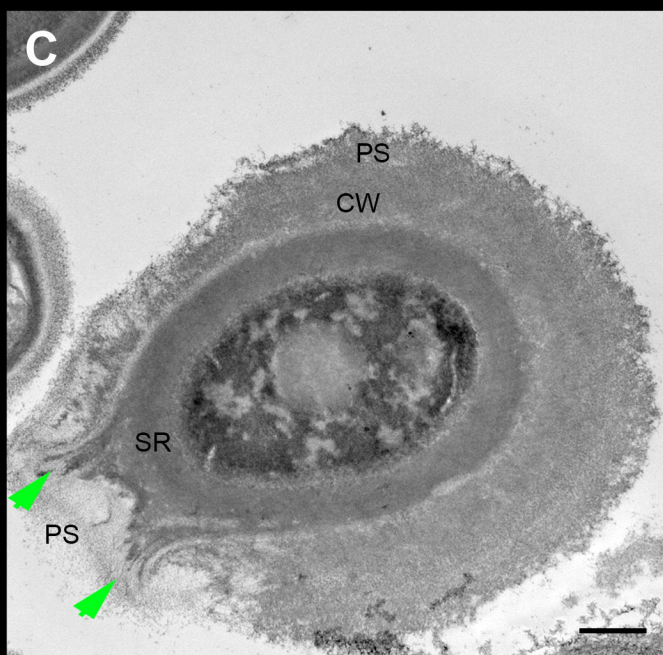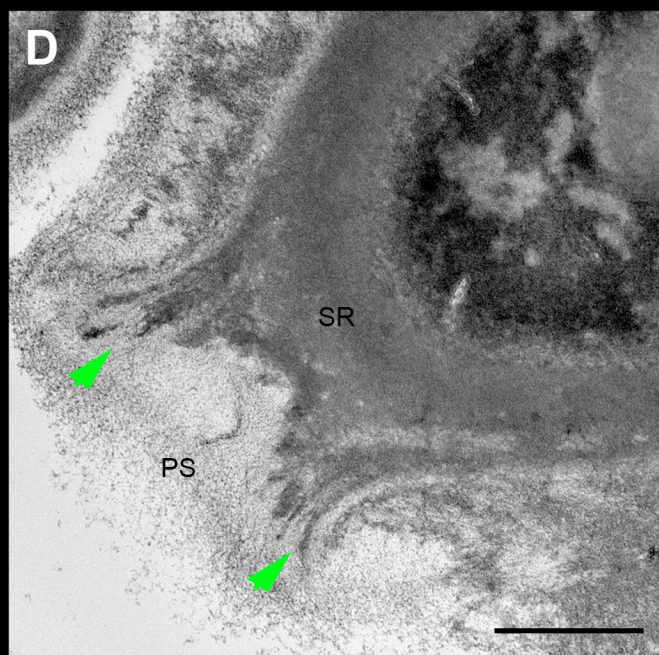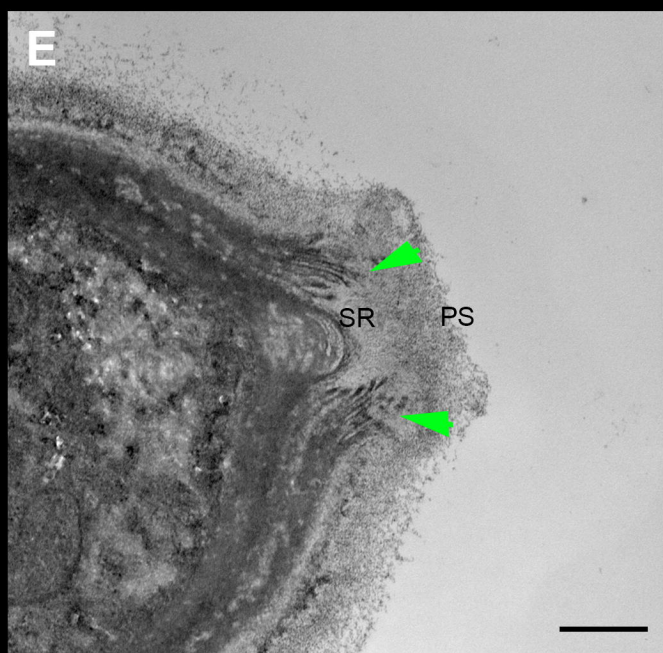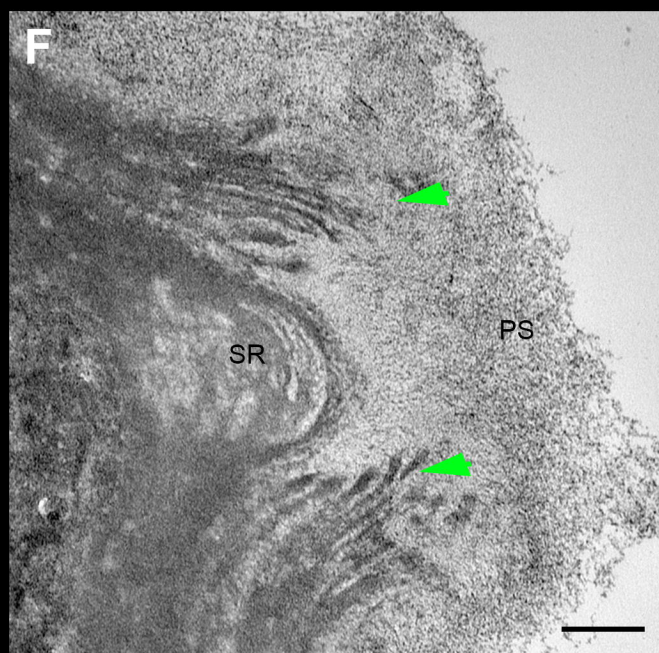



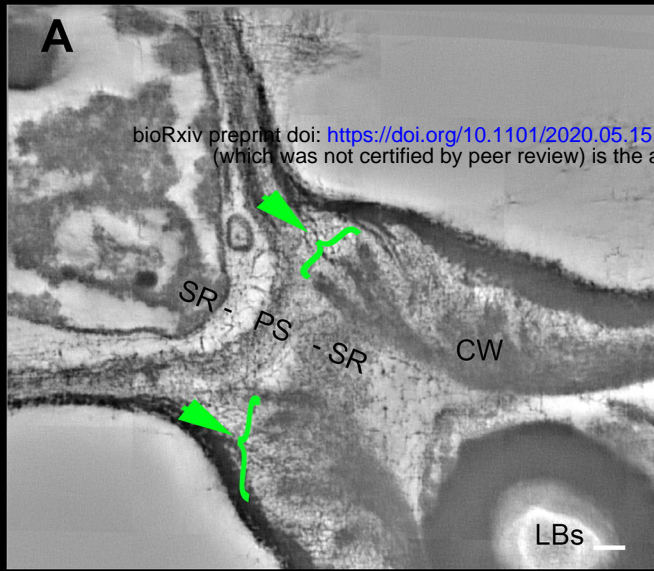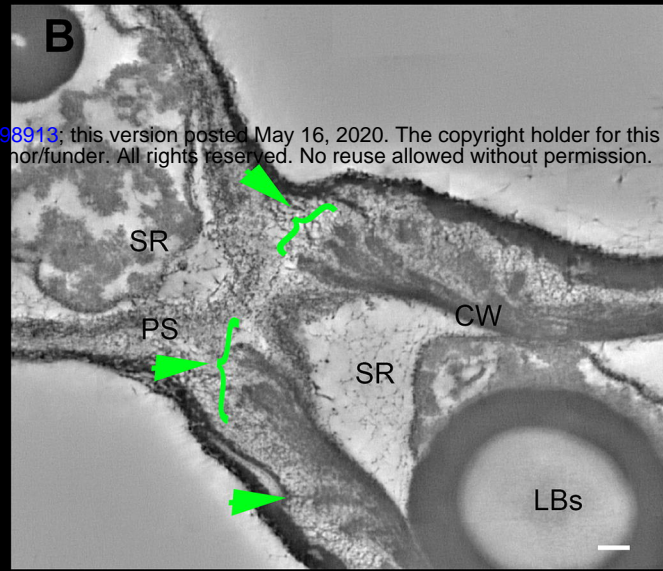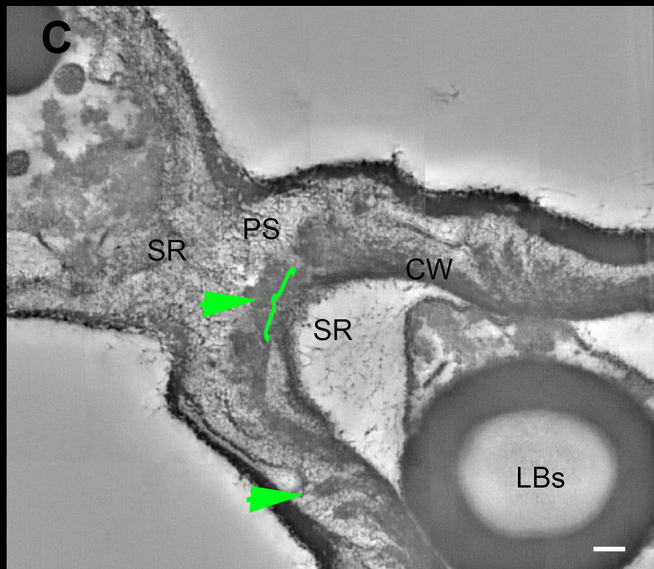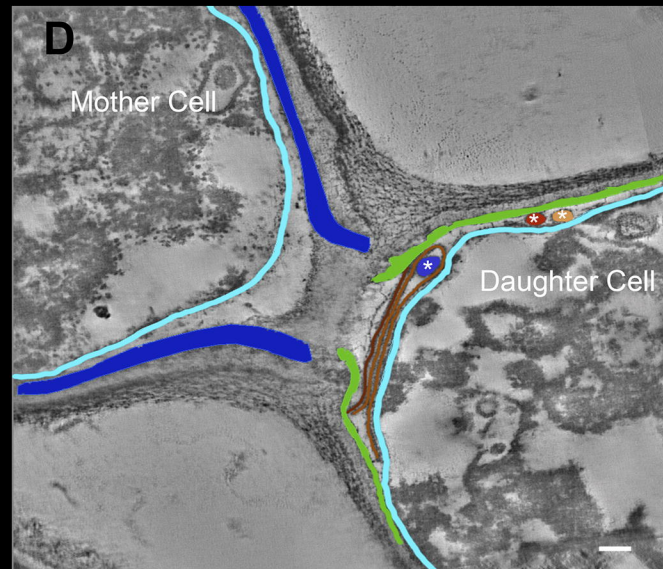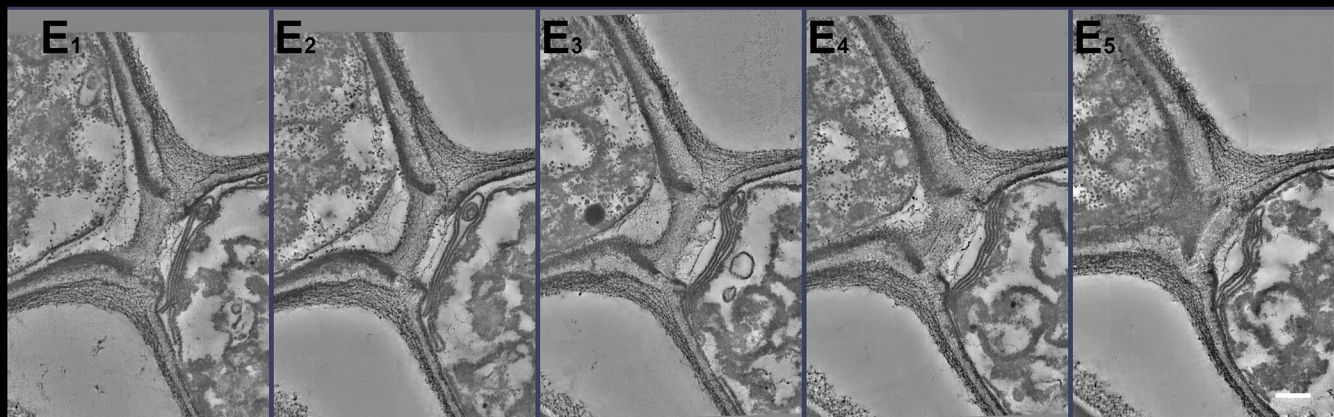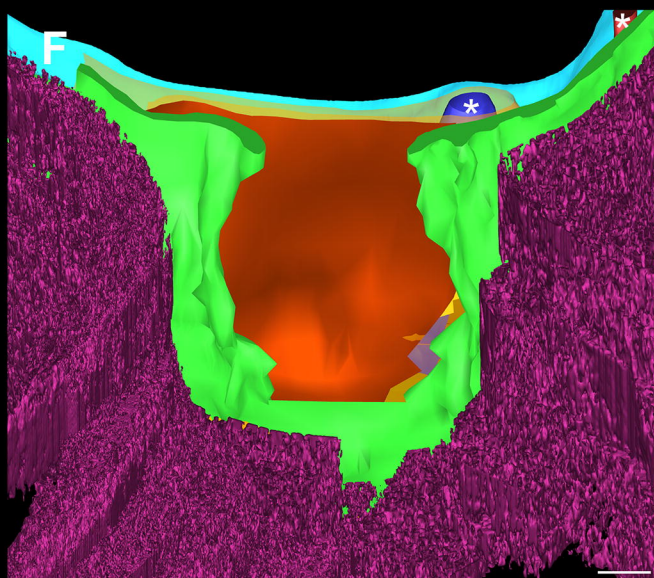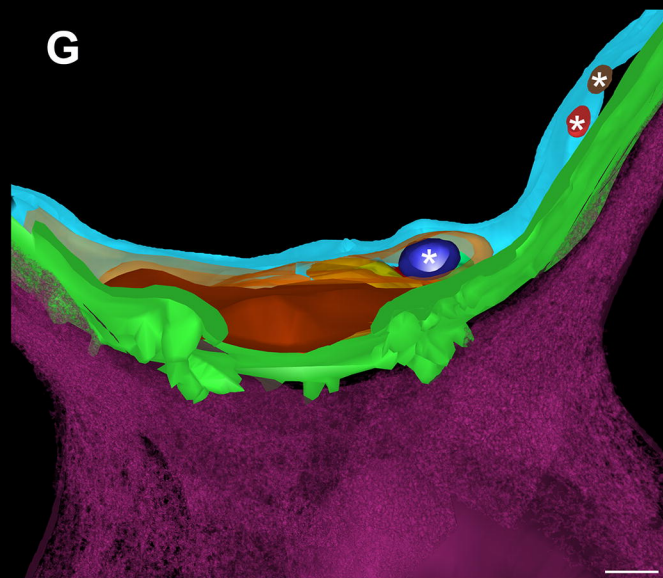

■ Polysaccharides ■ Mother Cell wall ■ Daughter Cell Wall ■ Multilamellar membrane  
■ Cell membrane ⊠ Vesicles



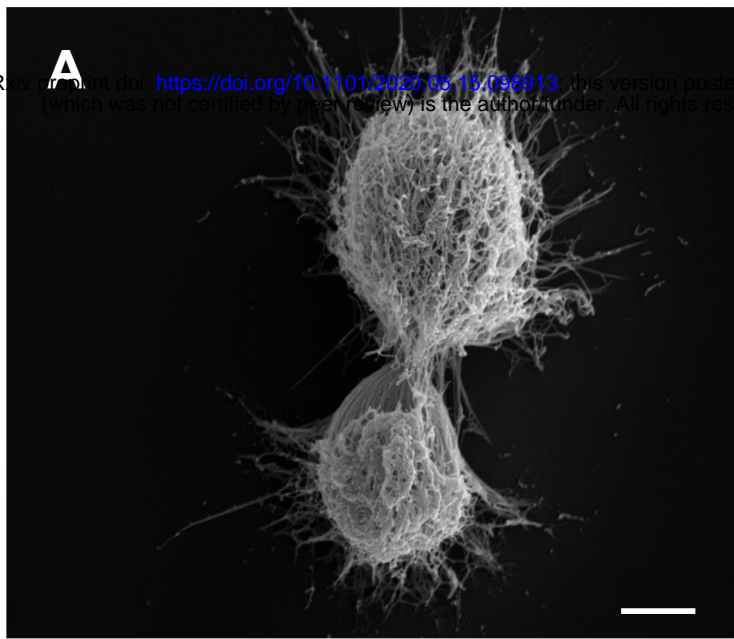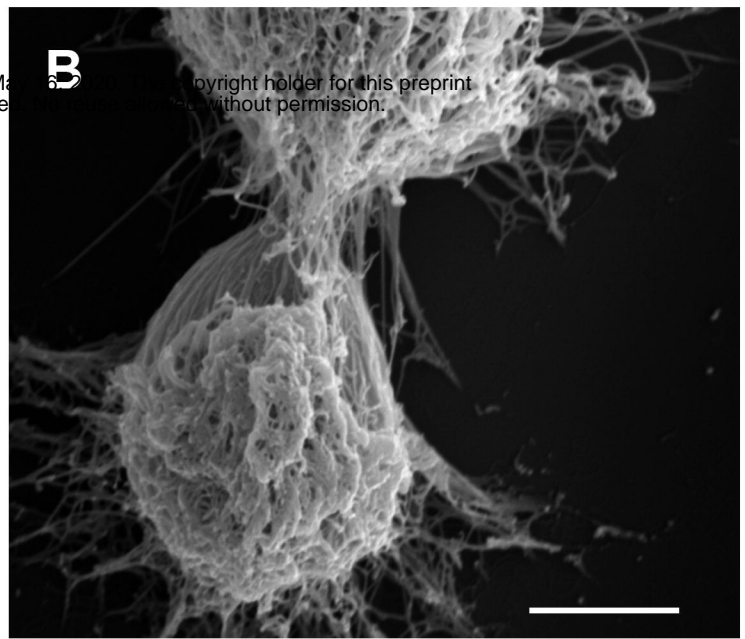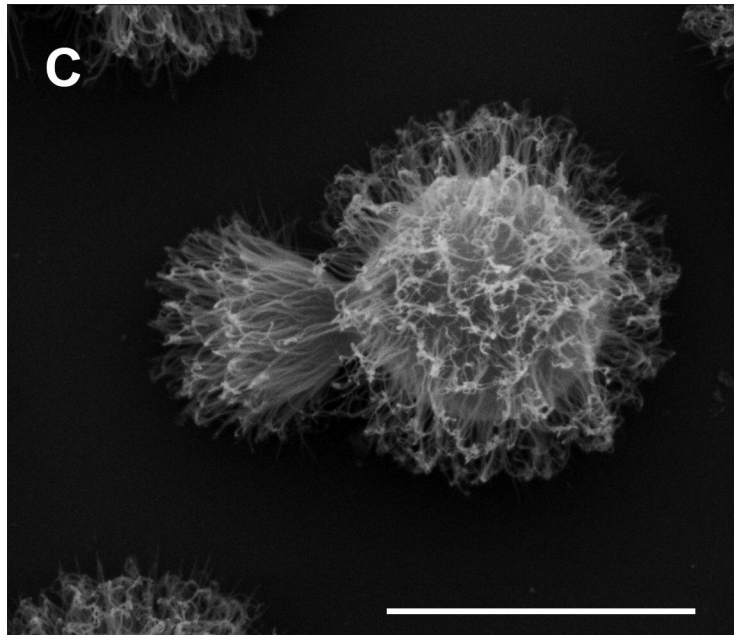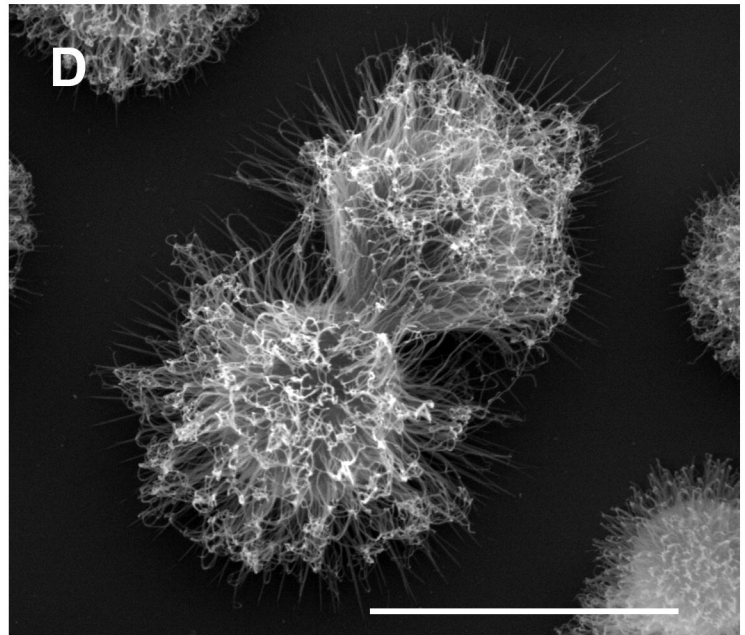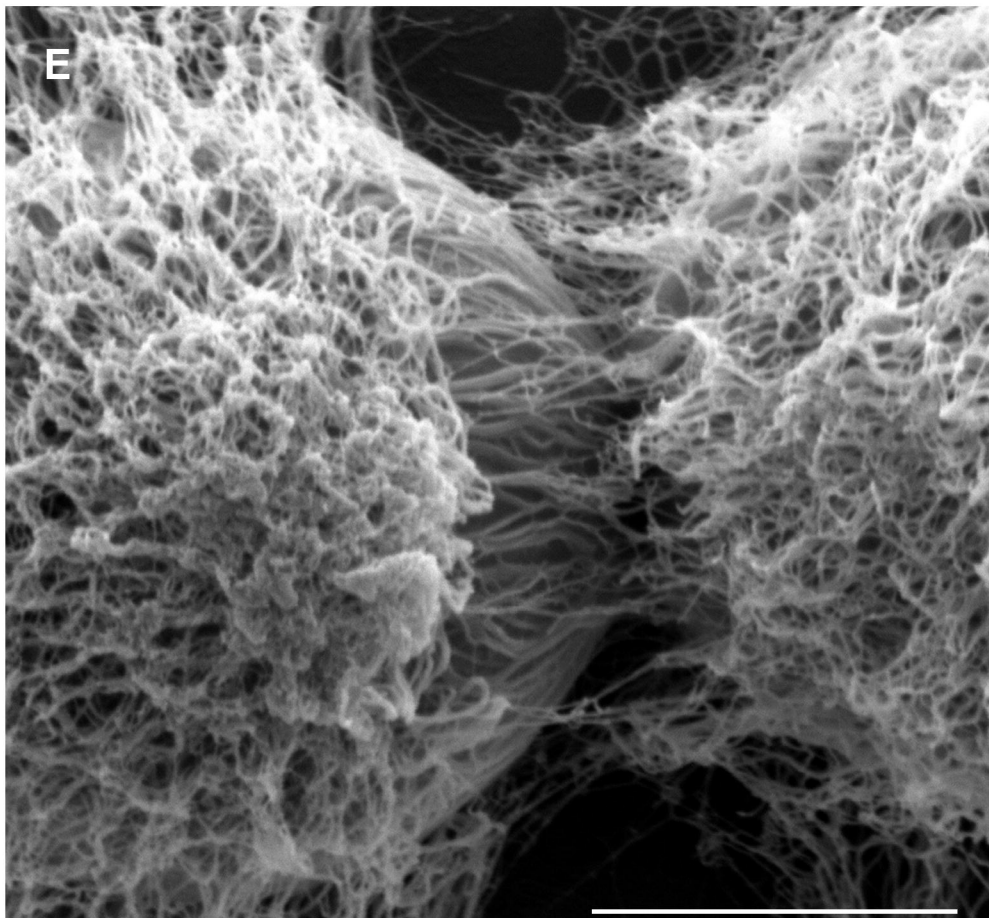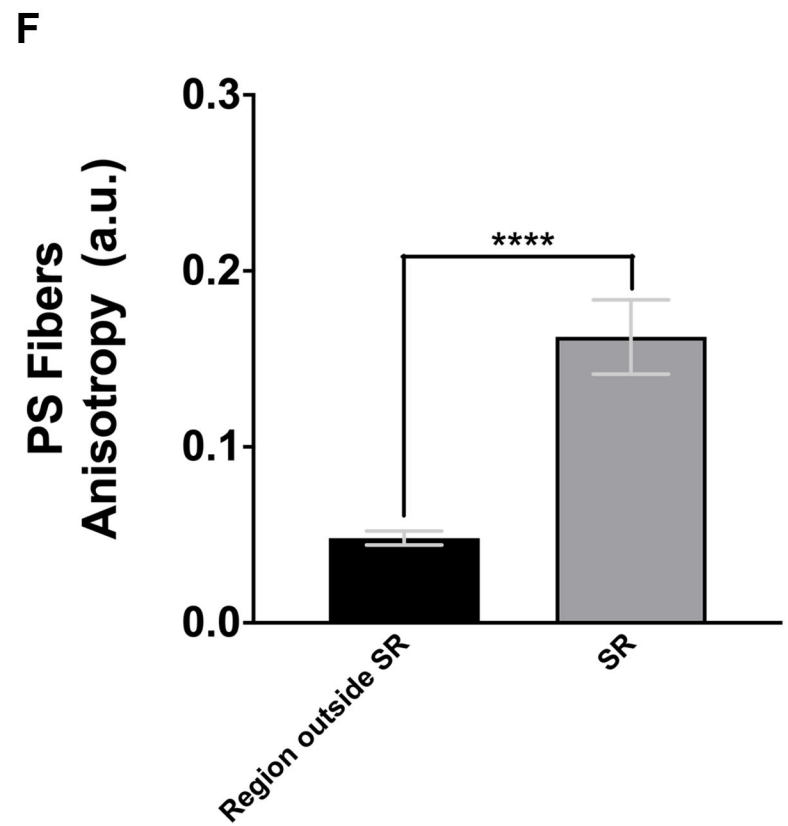

Source: https://www.biorxiv.org/content/biorxiv/early/2020/05/16/2020.05.15.098913.full.pdf
